# Supplementary material for: Fe3O4@mesoporous SBA-15: a robust and magnetically recoverable catalyst for one-pot synthesis of 3,4-dihydropyrimidin-2(1H)-ones via the Biginelli reaction
Source: Royal Society of Chemistry journal article supplement (doi:10.1039/c2dt30106g), 2012-01-01
Supplement: c2dt30106g.pdf [file c2dt30106g.pdf]

$\text{Fe}_3\text{O}_4$ @ mesoporous SBA-15: A robust and magnetically recoverable catalyst for  
one-pot synthesis of 3,4-dihydropyrimidin-2(1*H*)-ones via Biginelli reaction

John Mondal, Tapas Sen and Asim Bhaumik\*

**Supporting information**

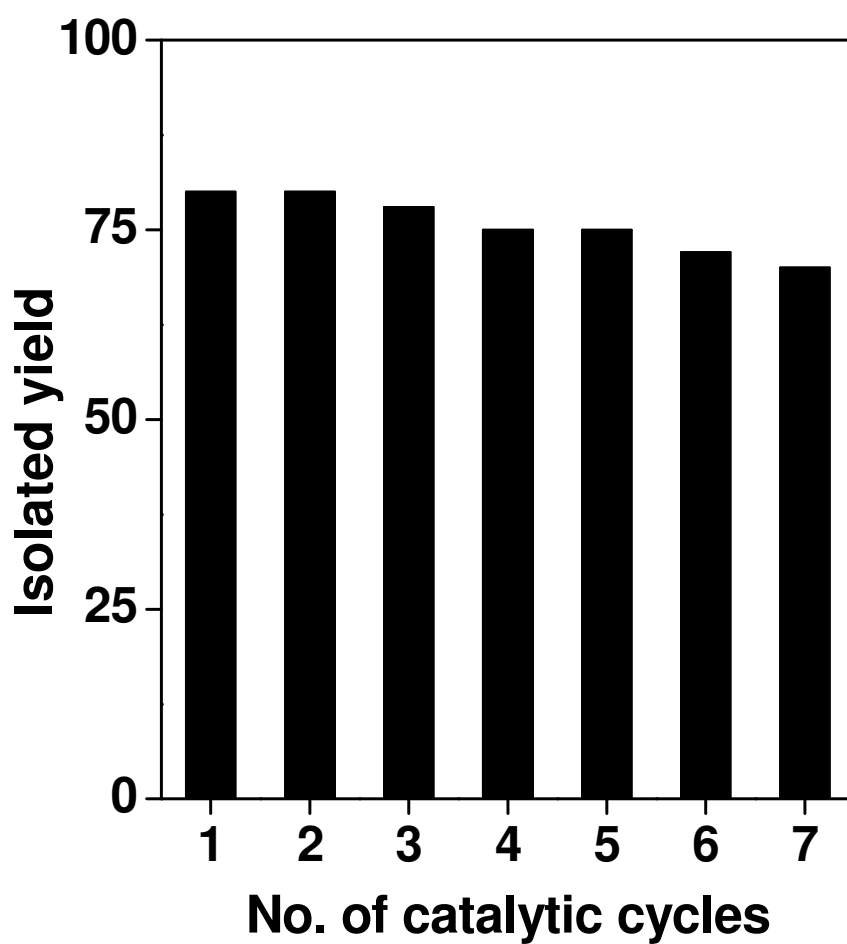

Figure S1: Recycling efficiency  $\text{Fe}_3\text{O}_4$  nanoparticle functionalized mesoporous SBA-15.

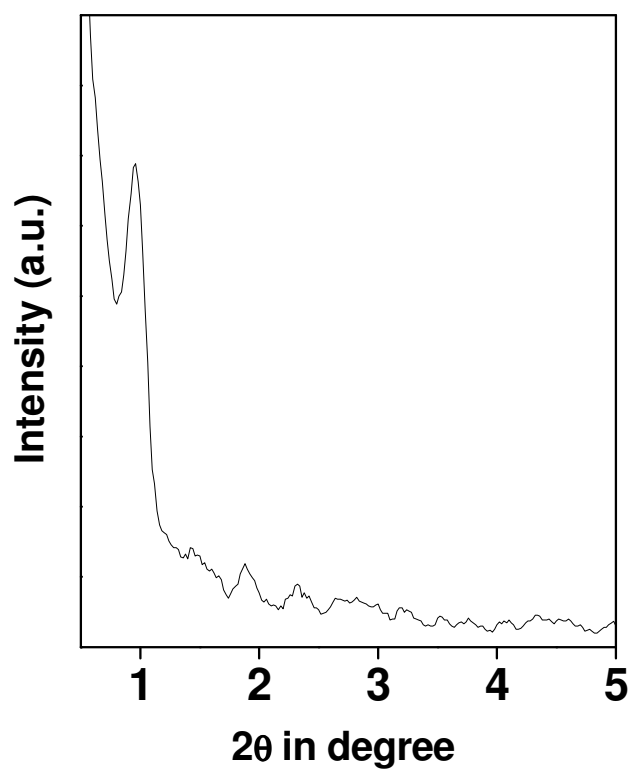

Figure S2: Small angle powder XRD pattern of reused magnetic nanocatalyst.

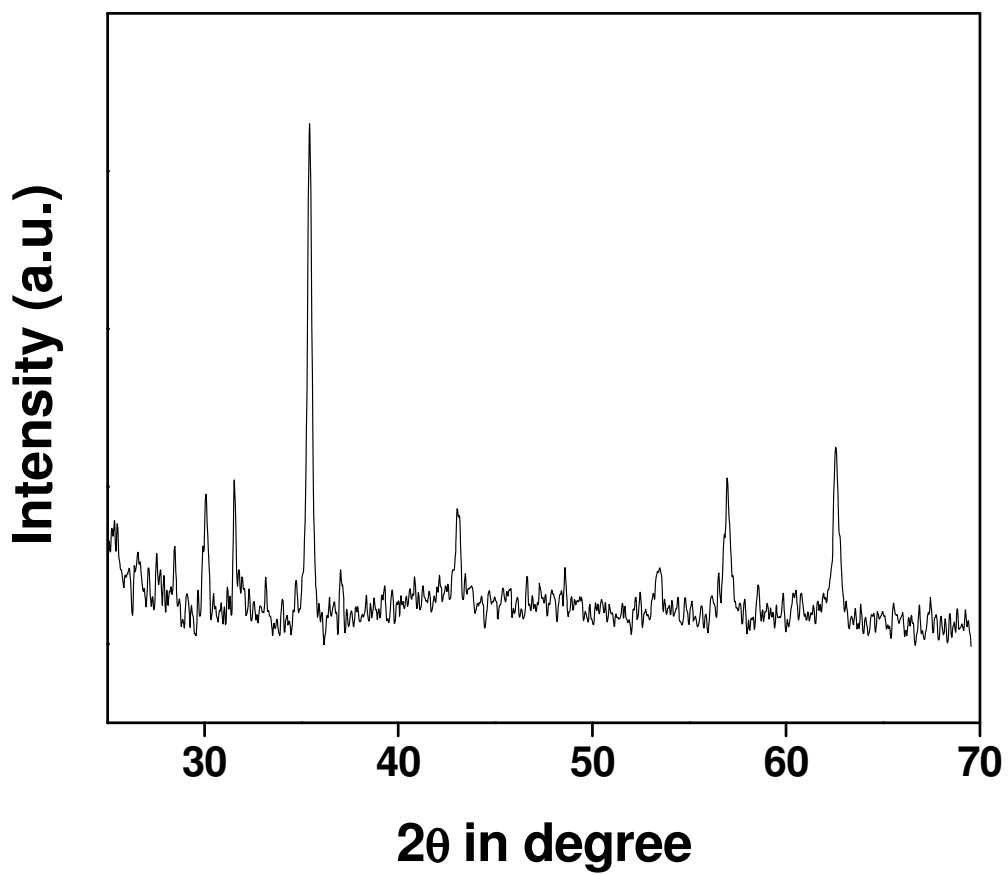

Figure S3: Wide angle powder XRD pattern of the reused magnetic nanocatalyst.

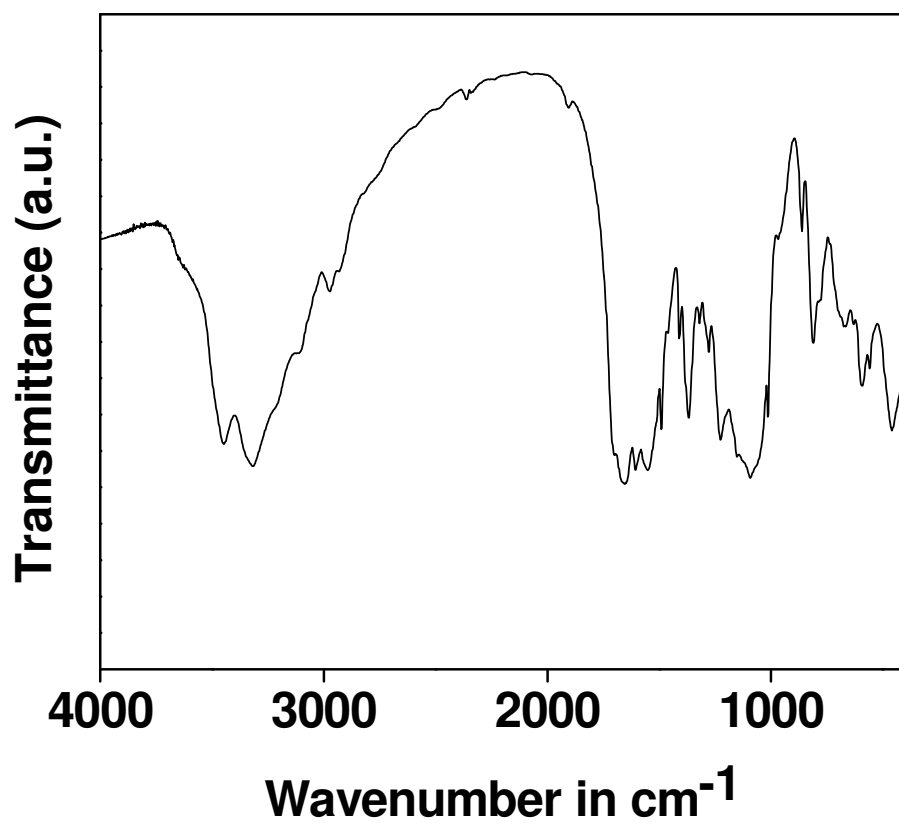

Figure S4: FT-IR spectra of the reused magnetic nanocatalyst.



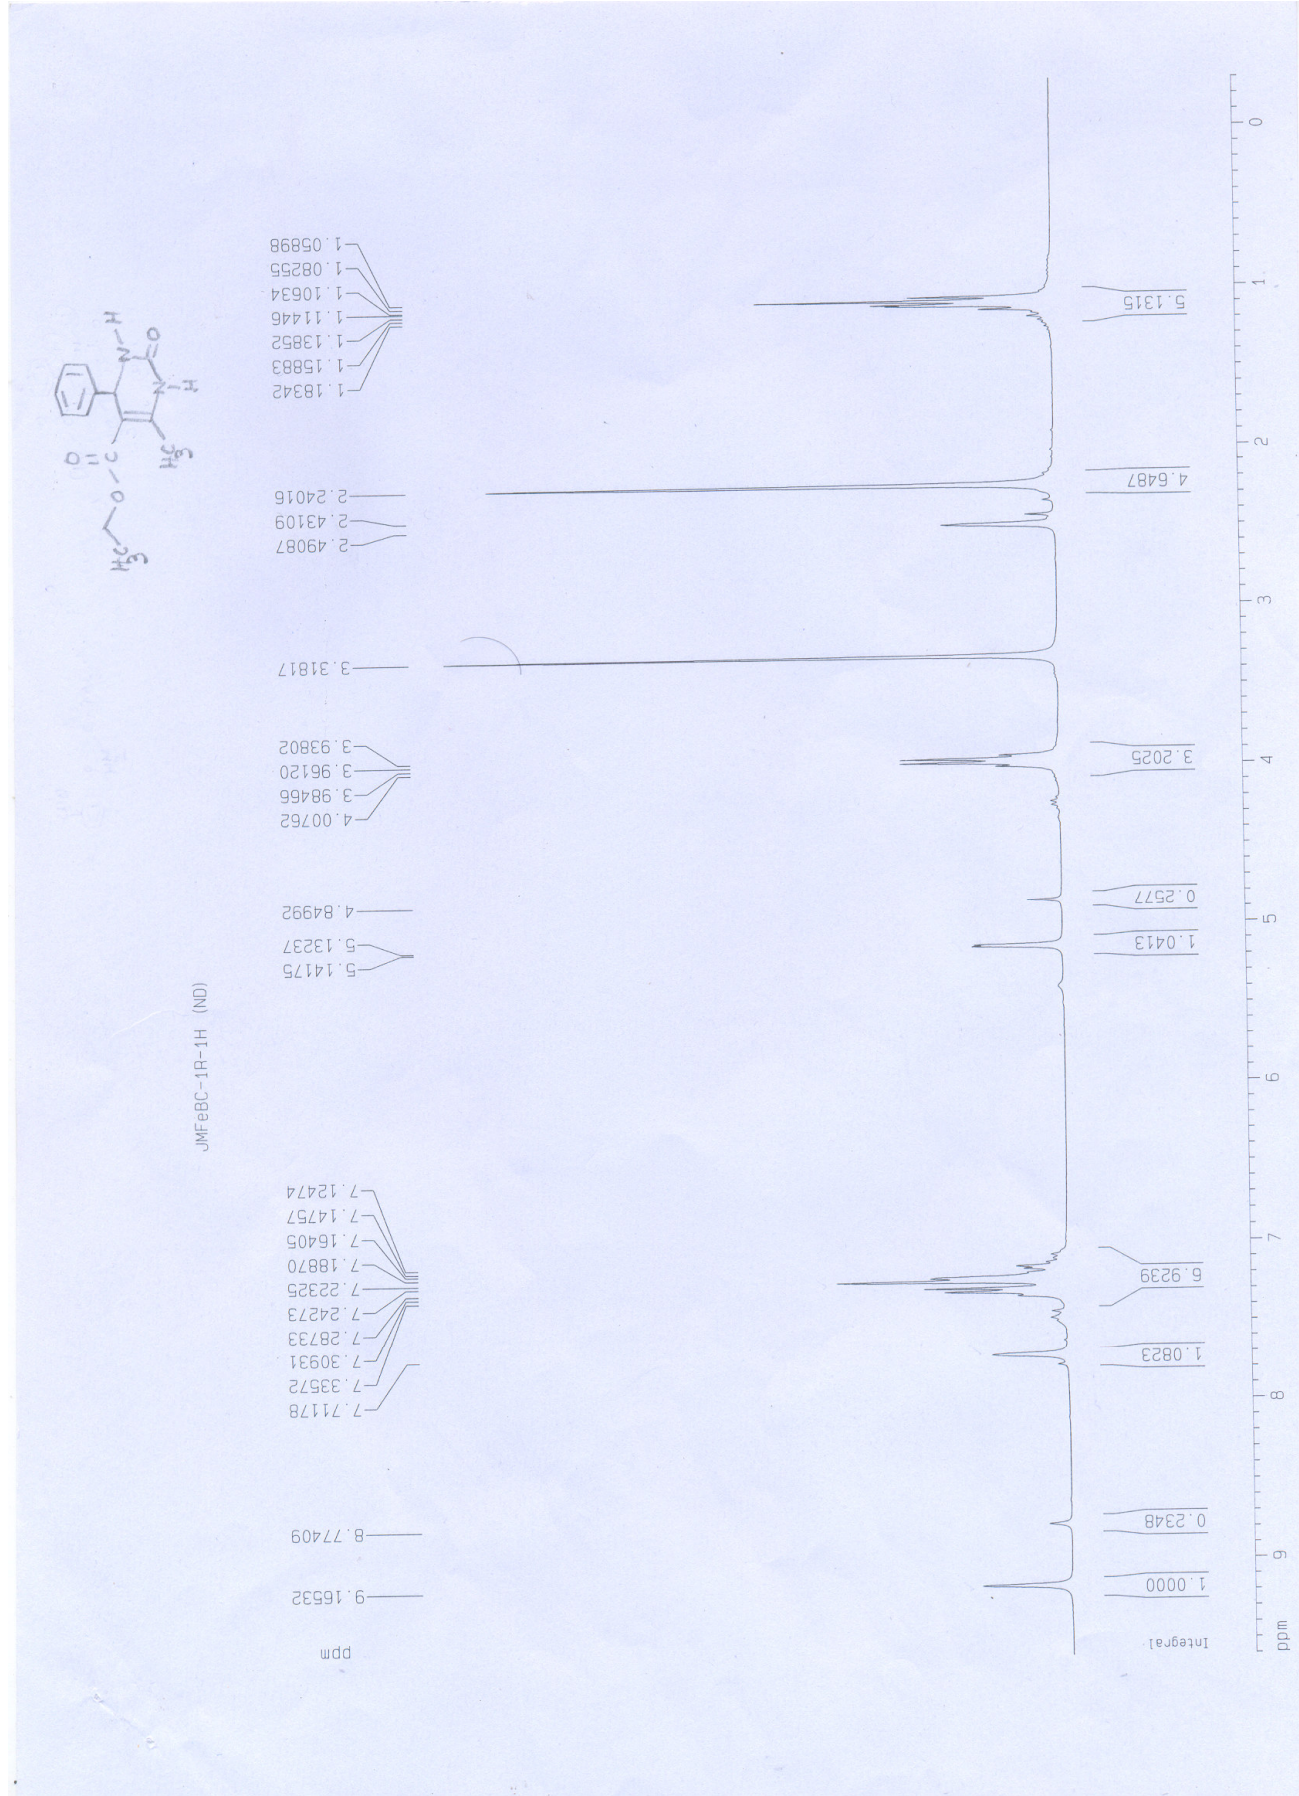



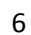



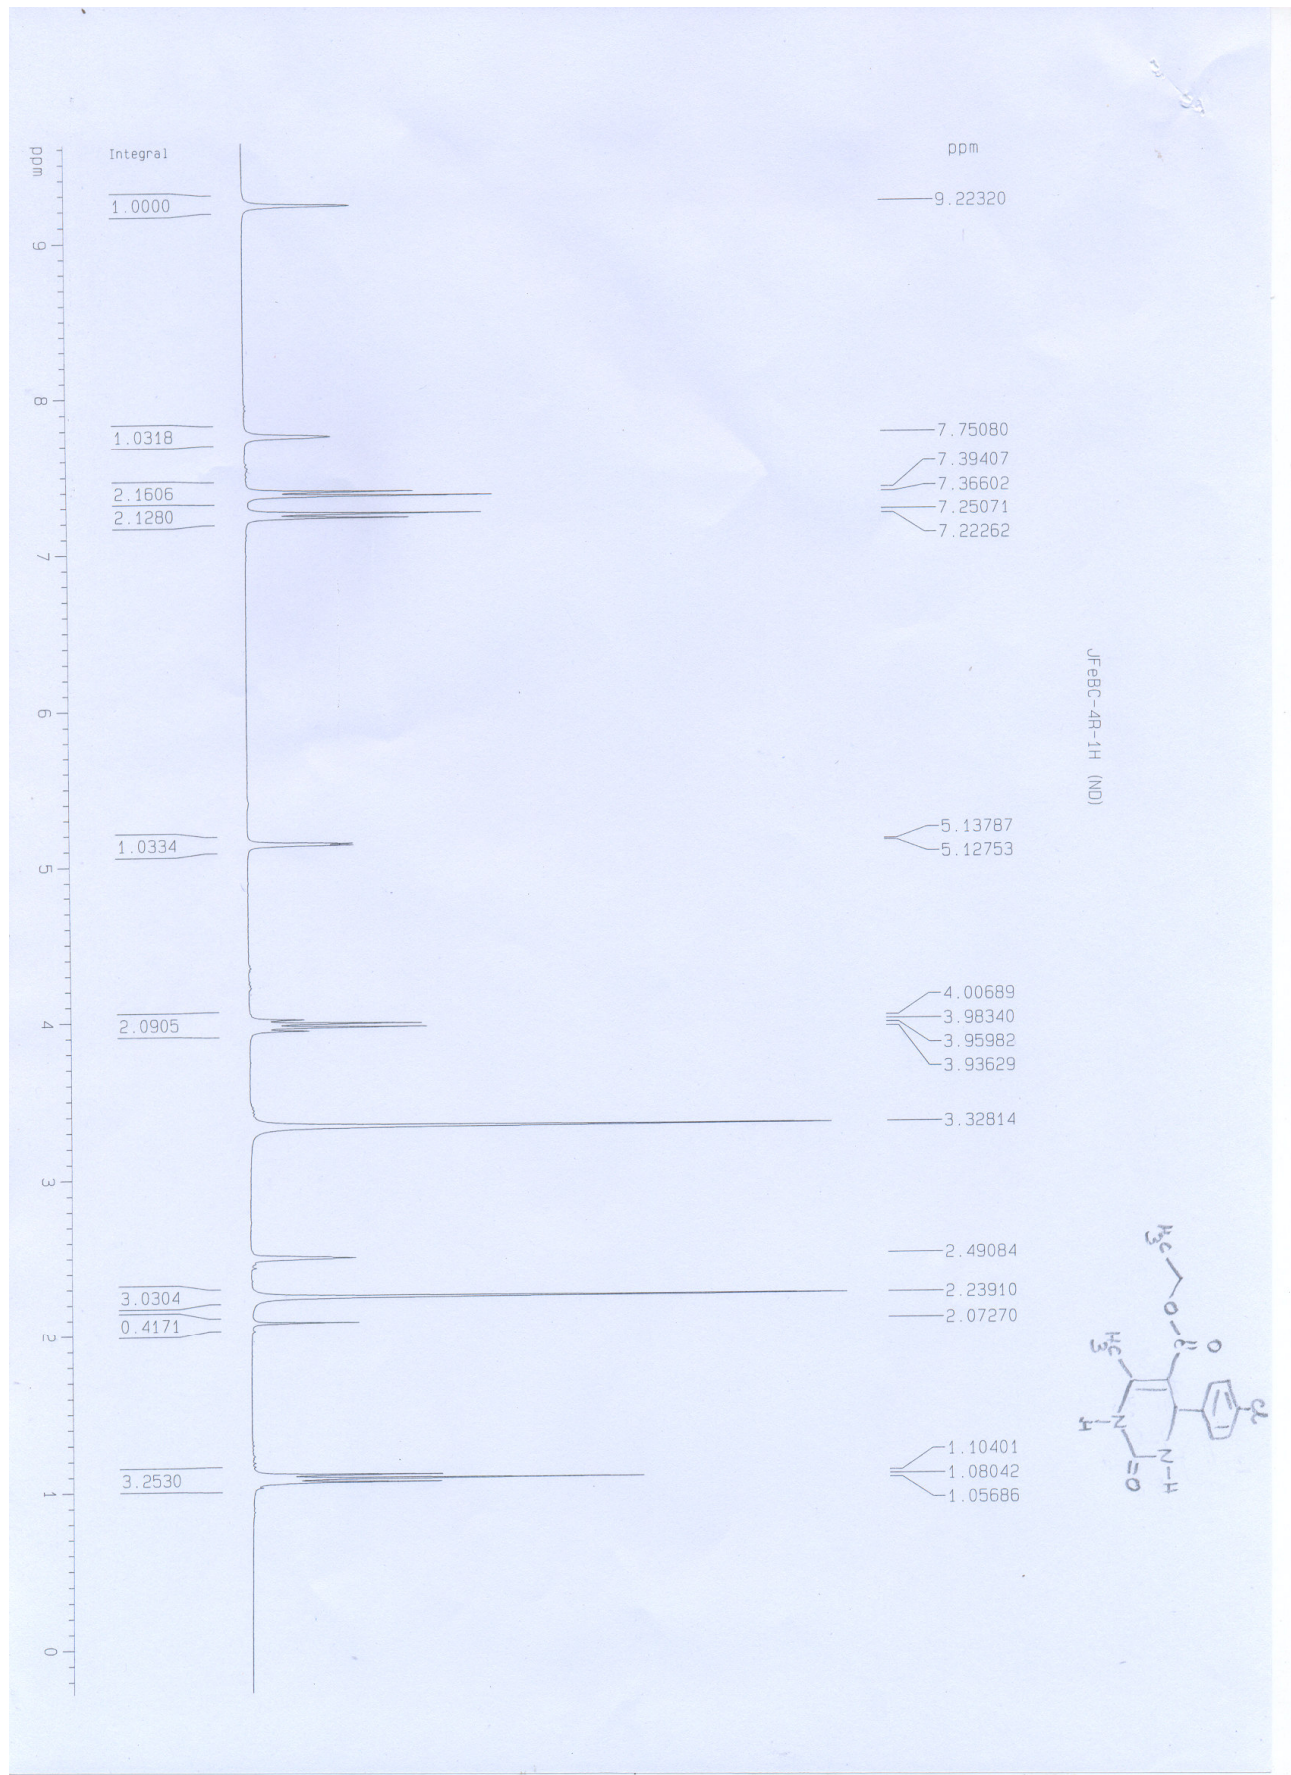



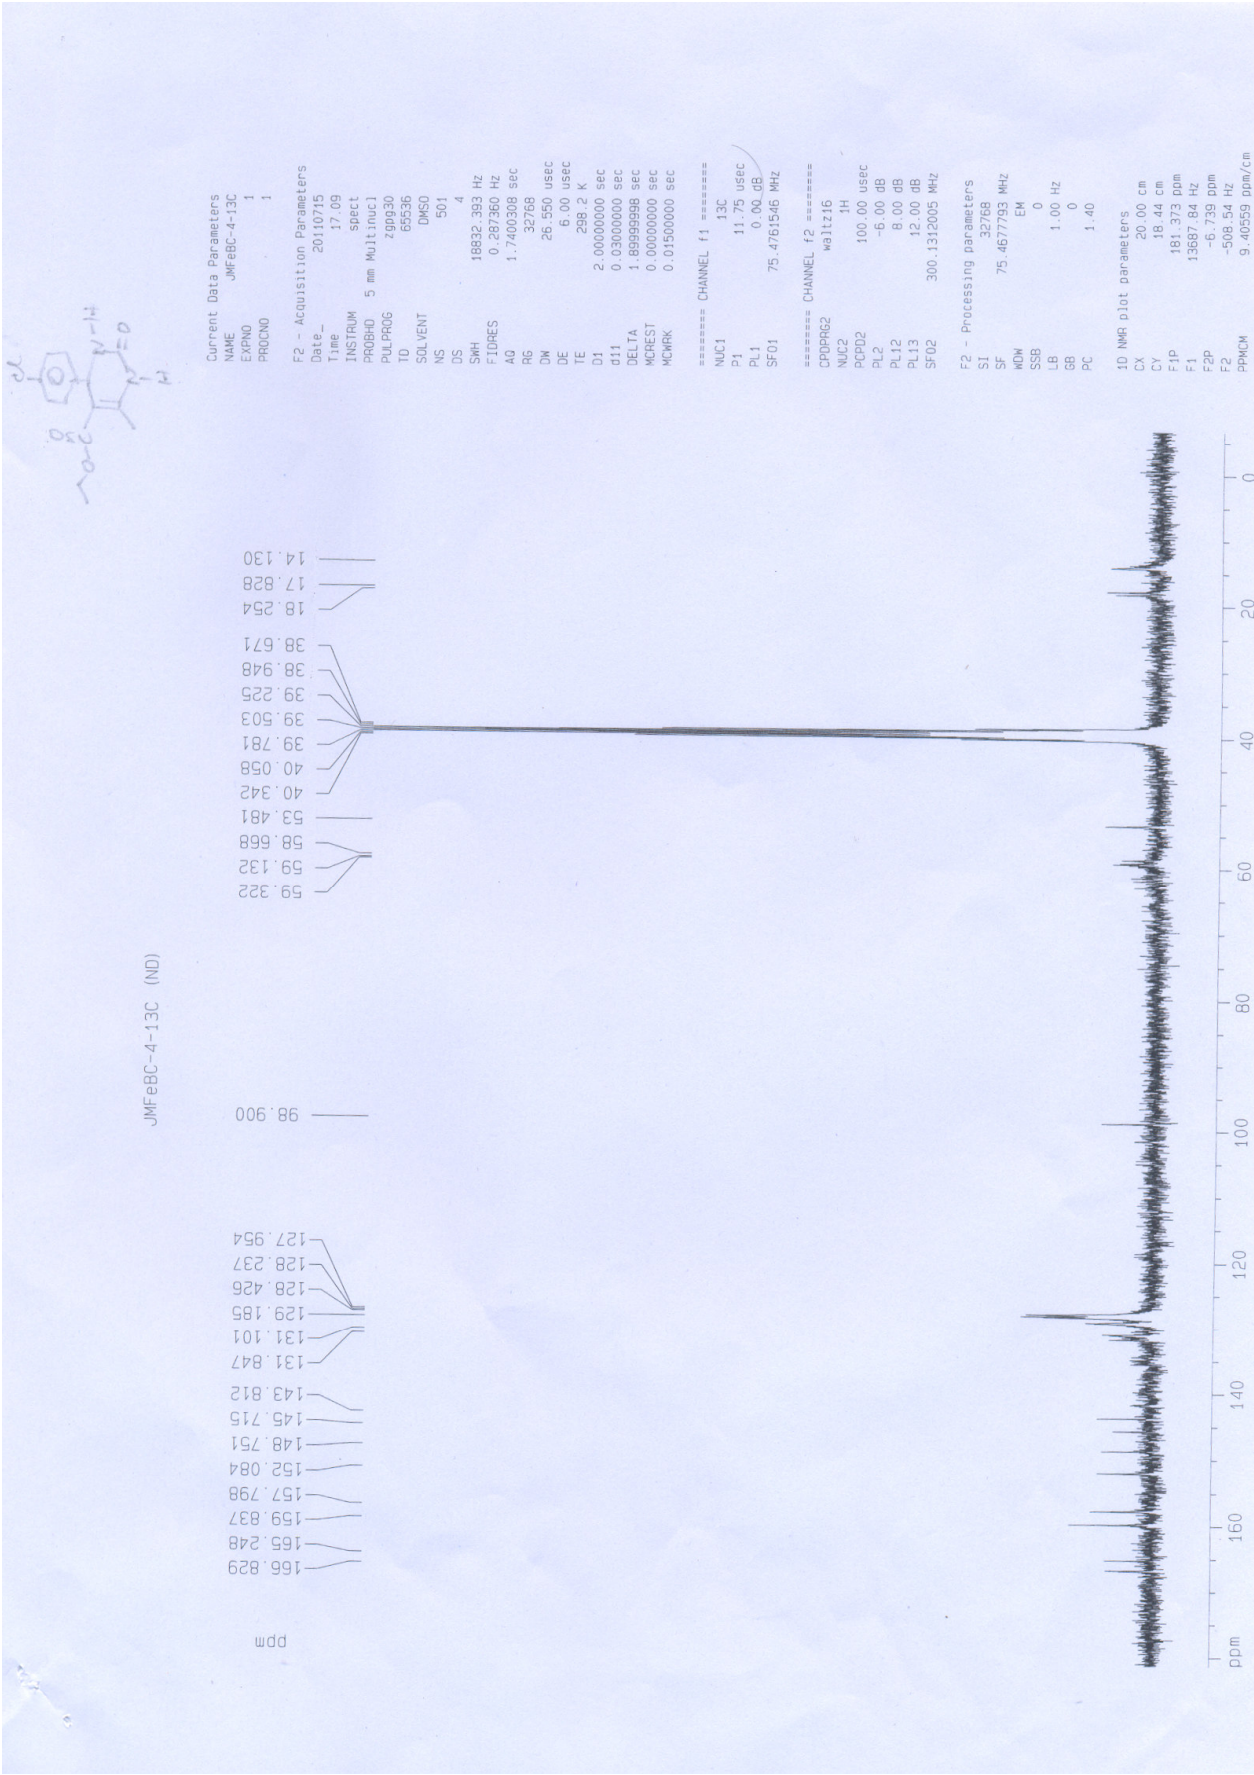



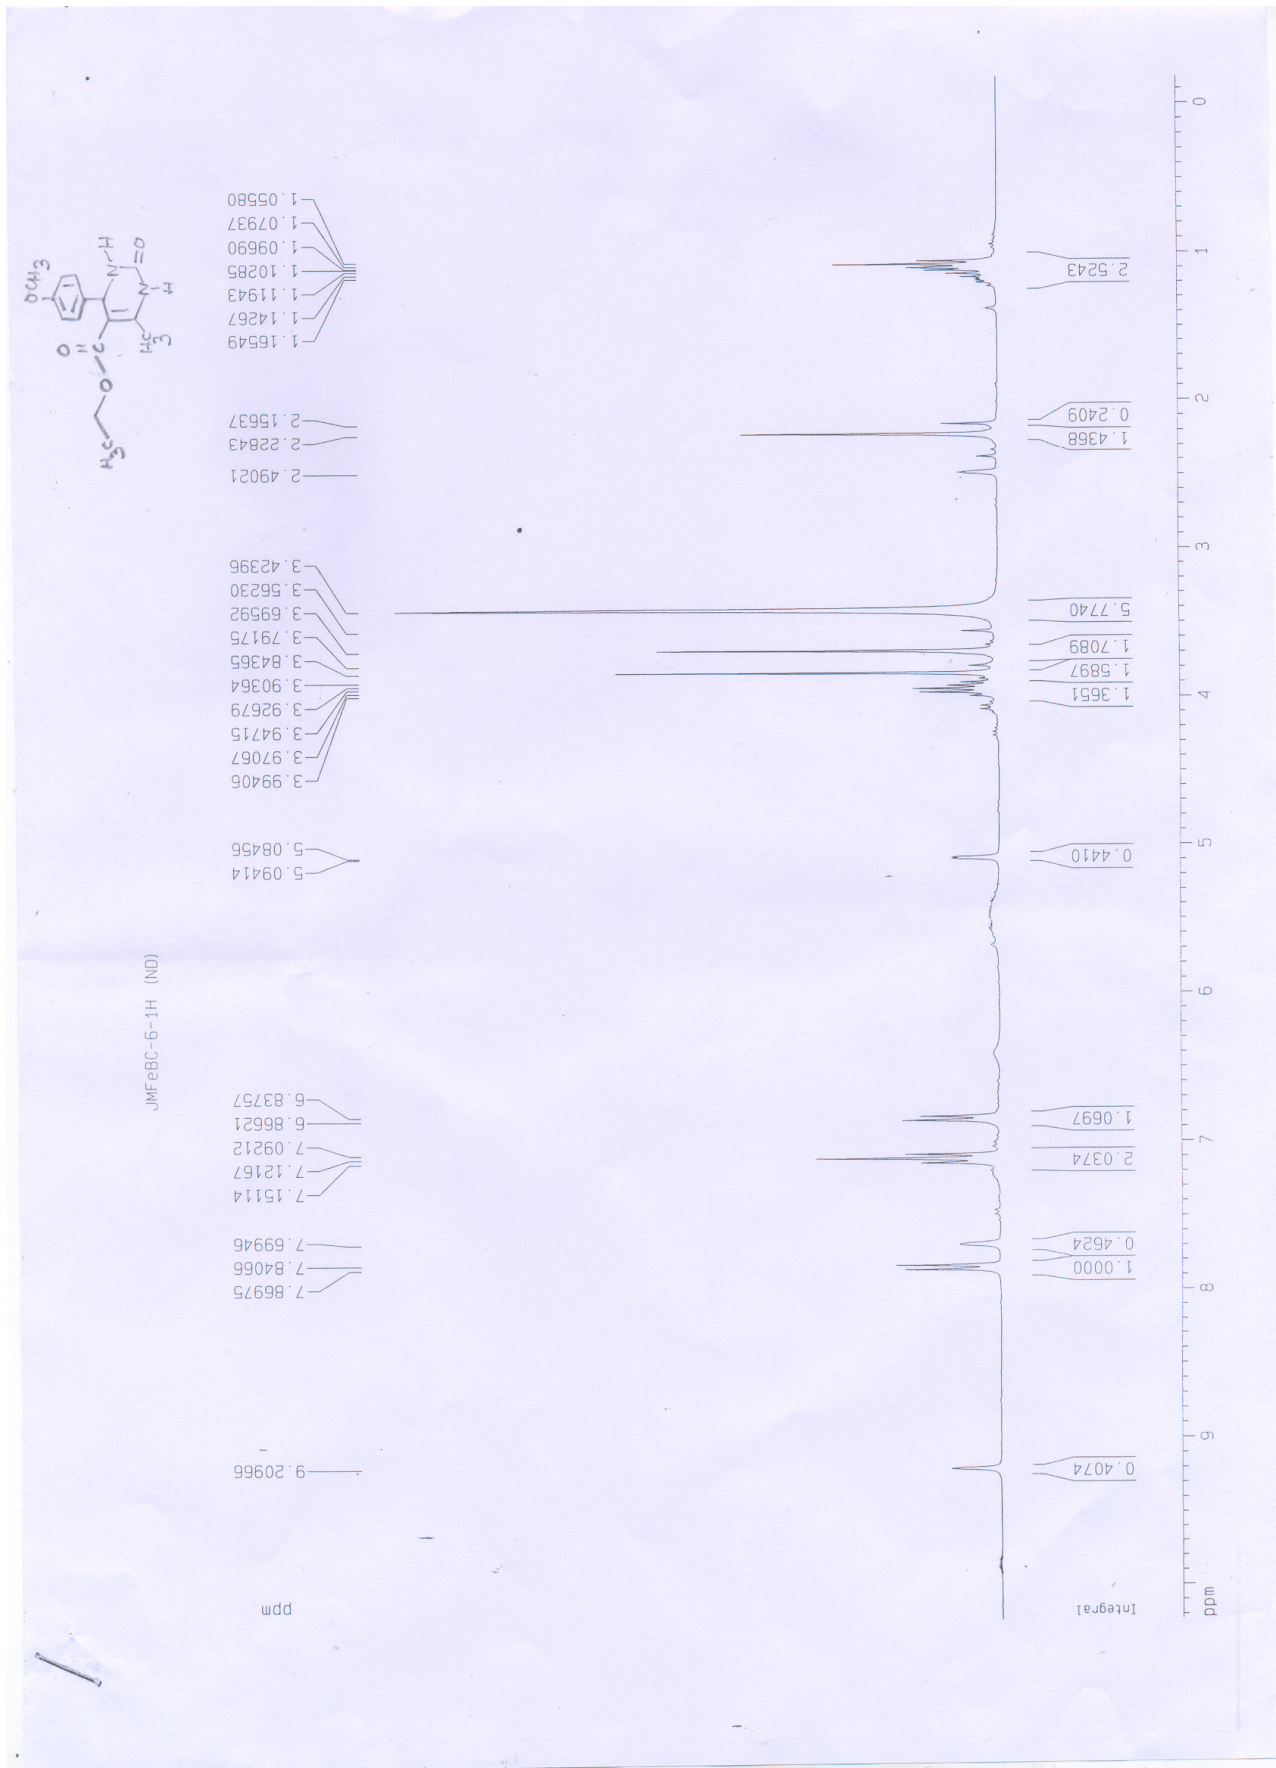



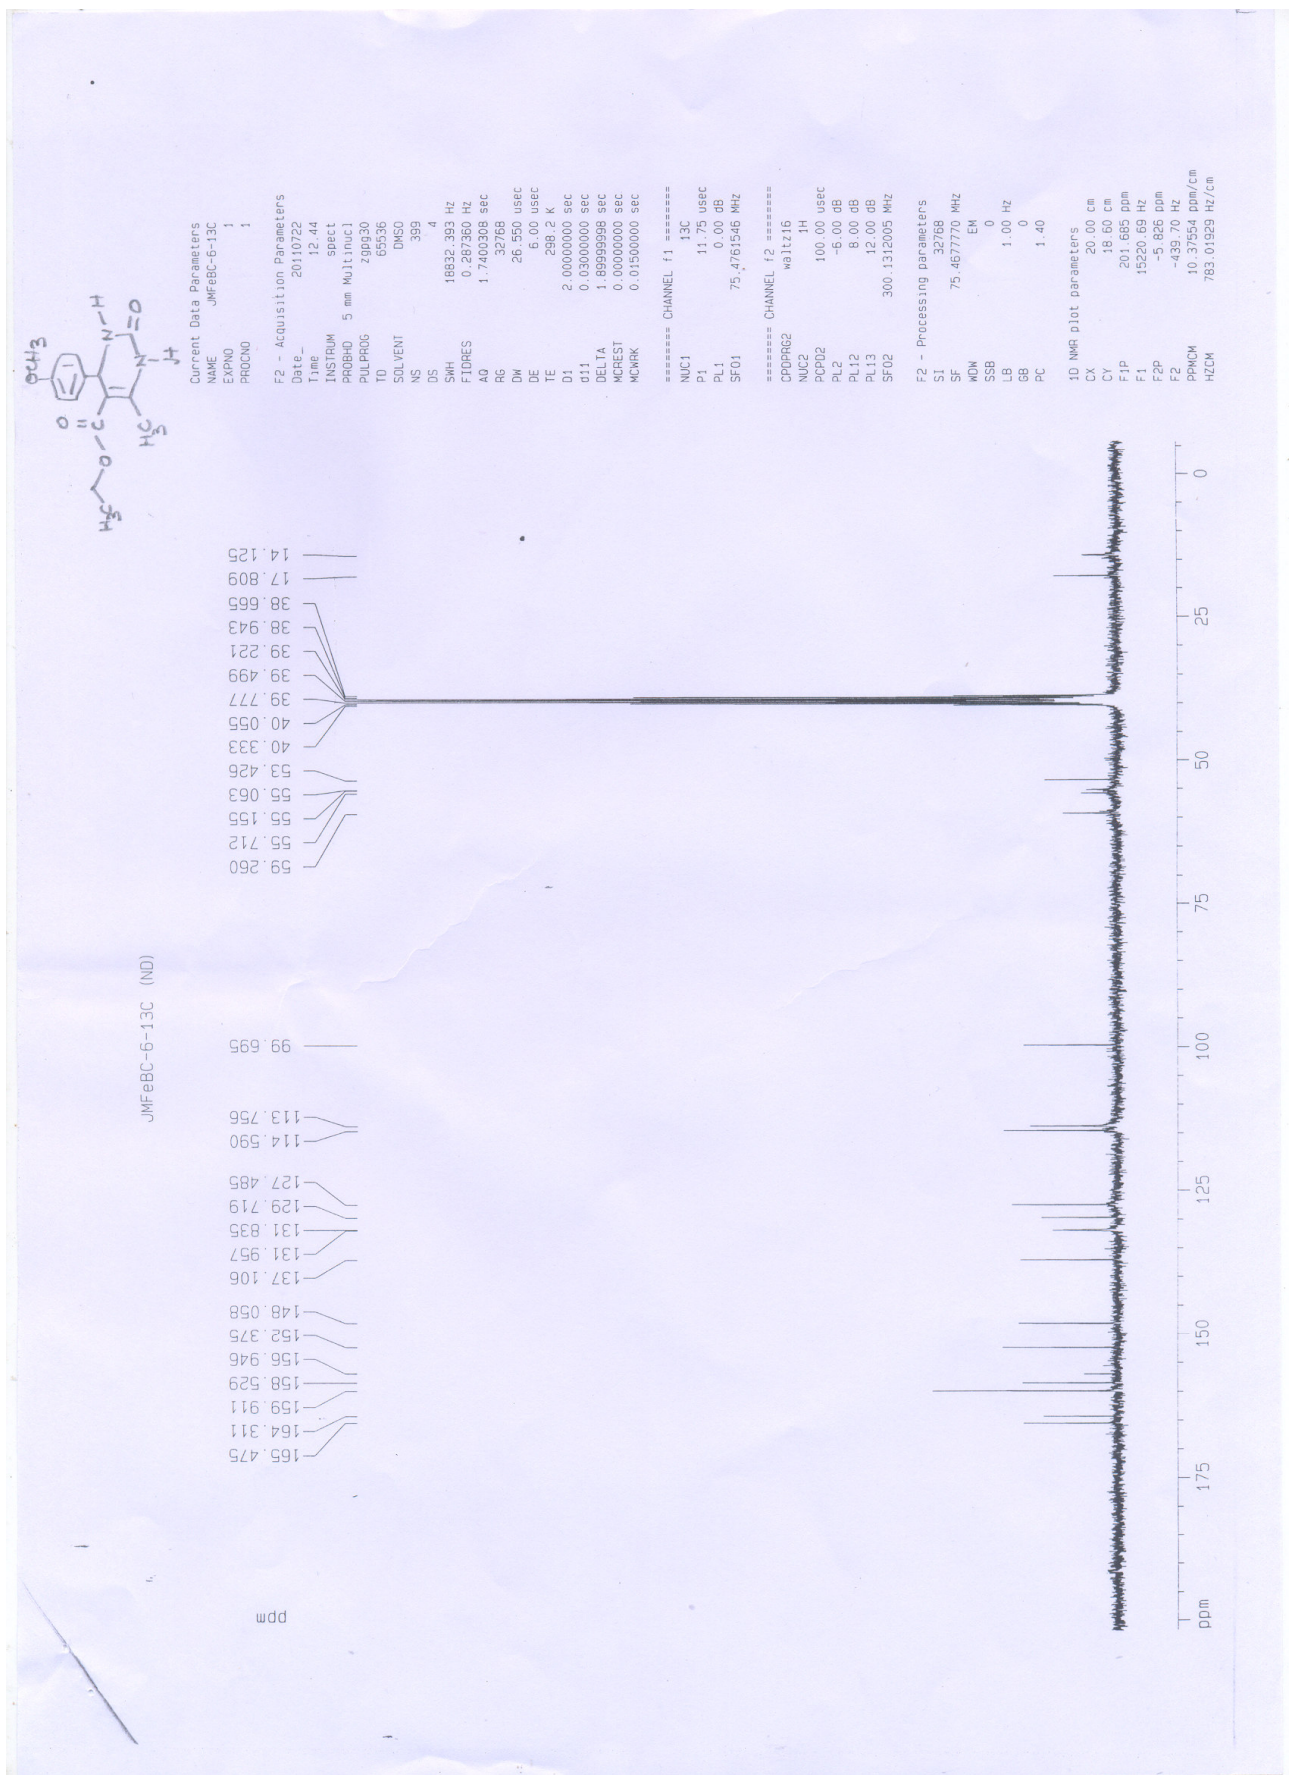



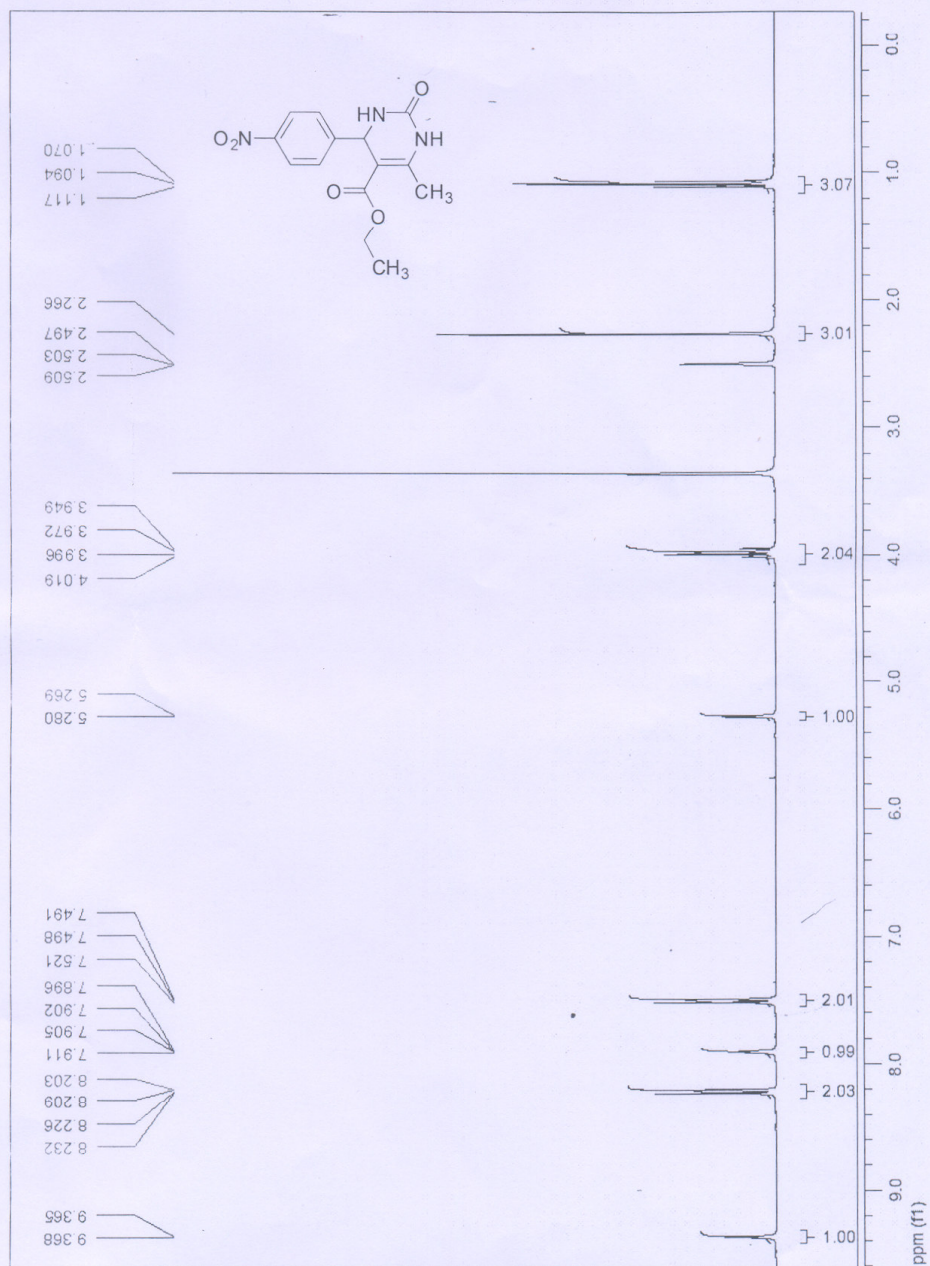

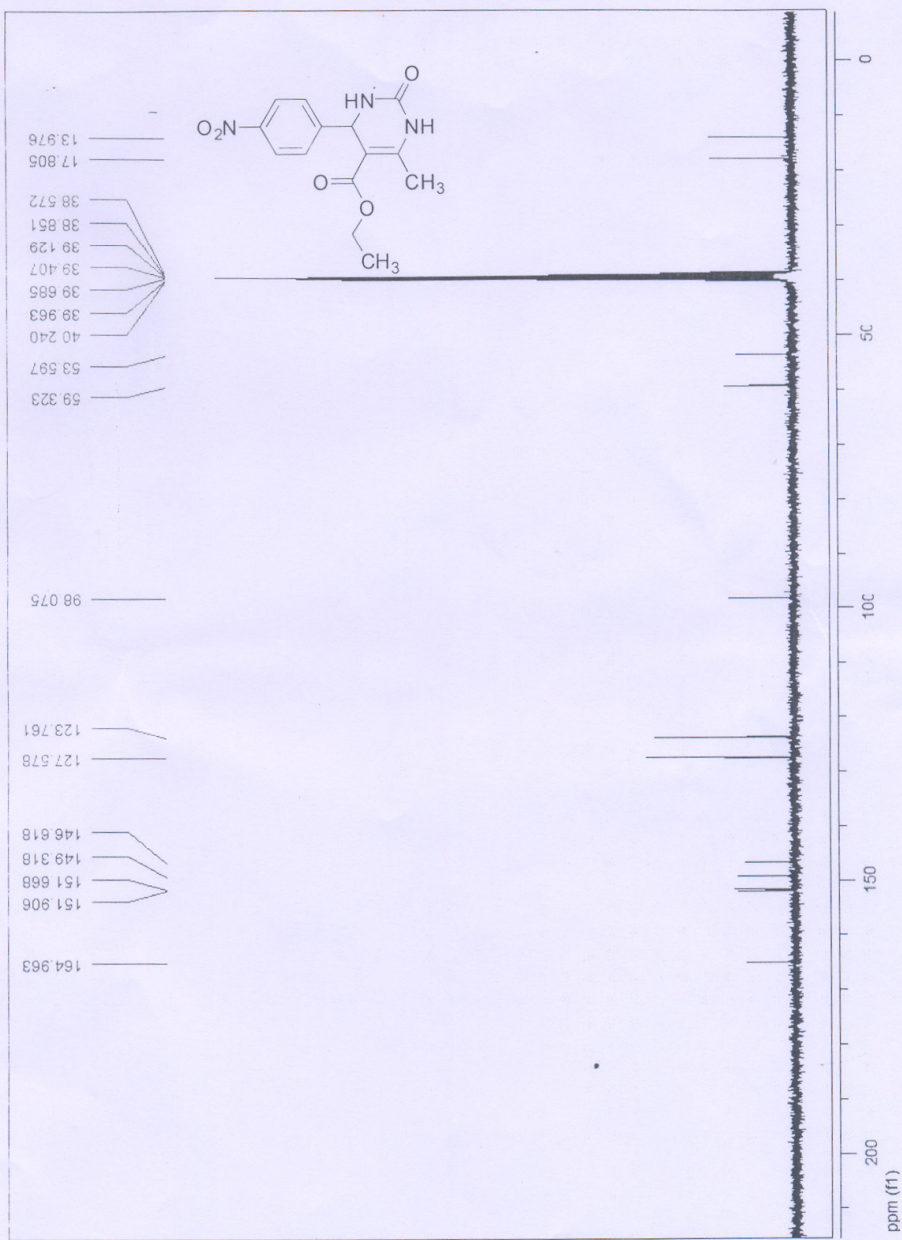



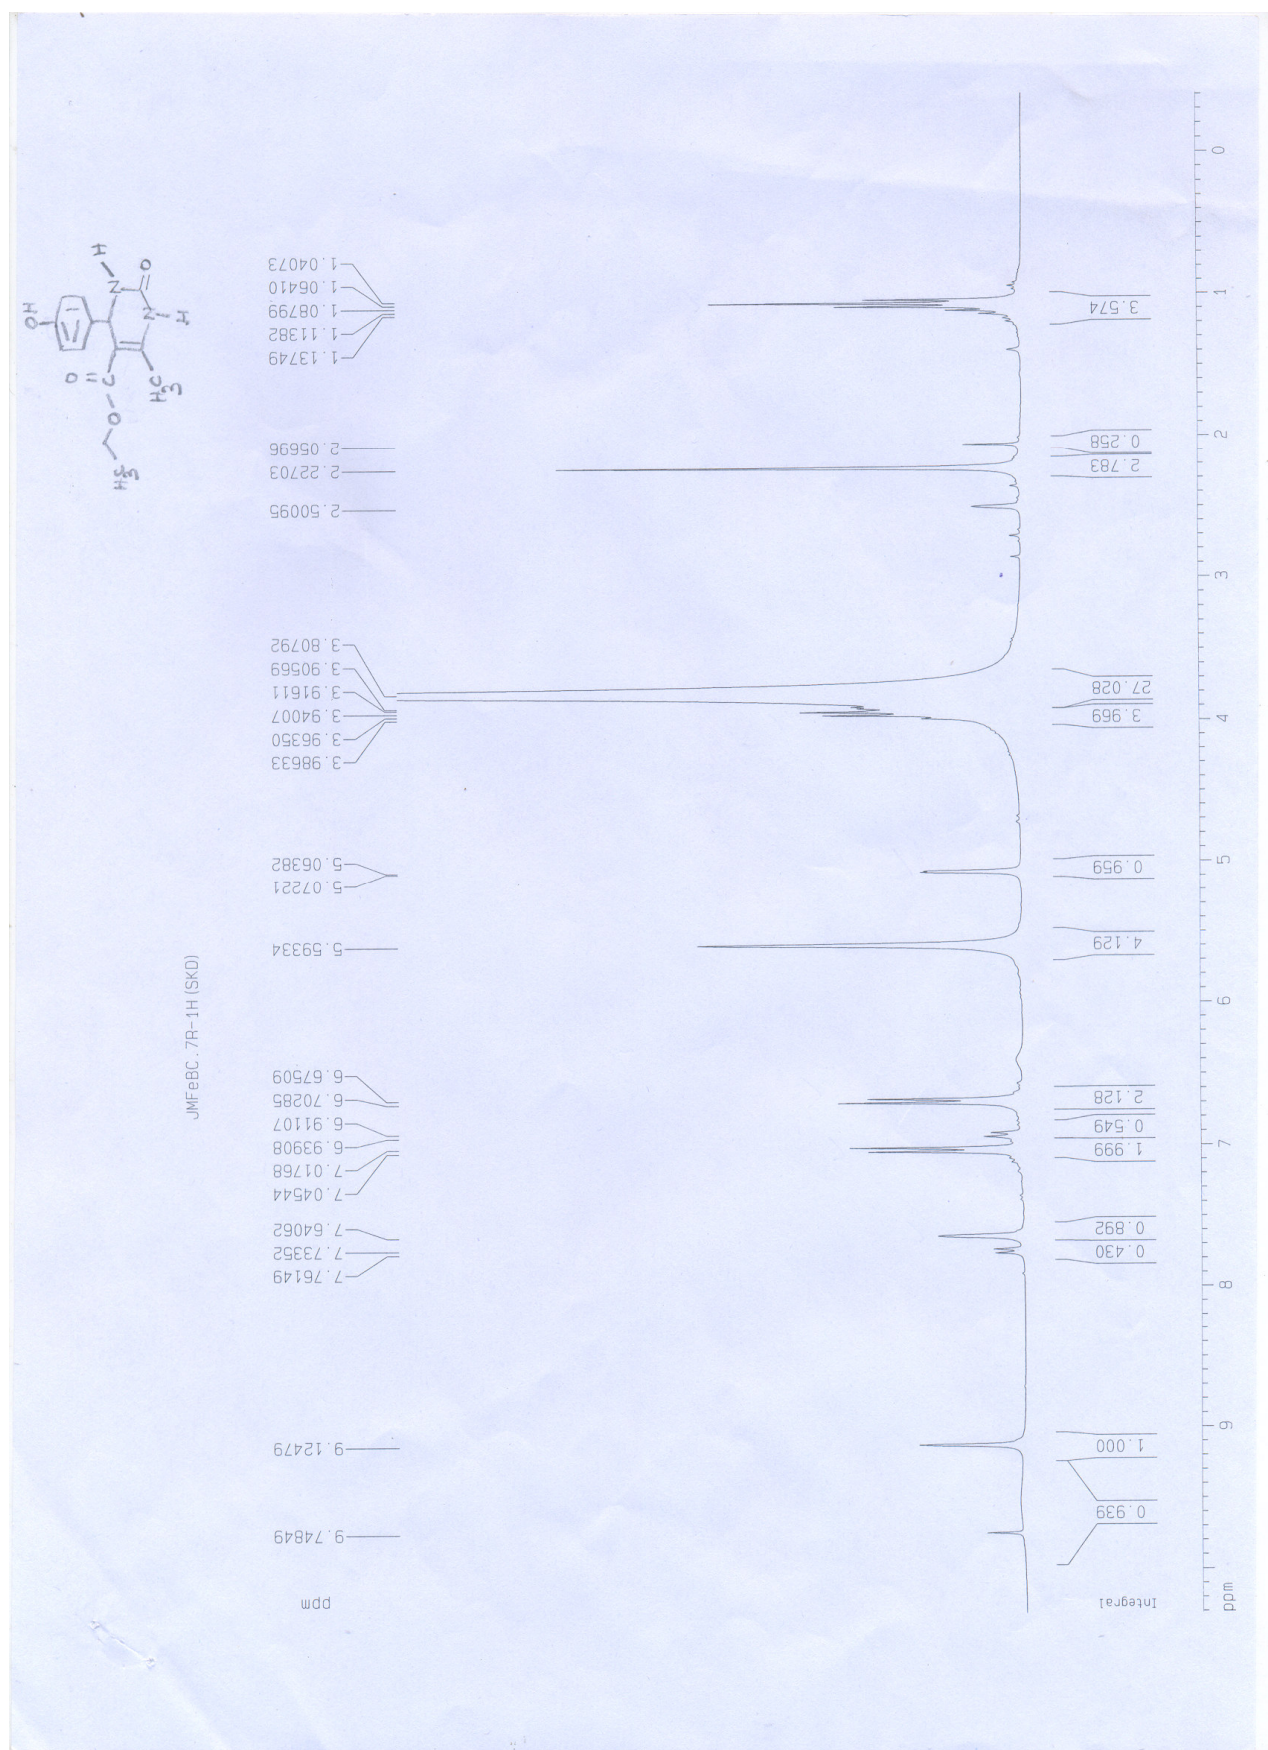



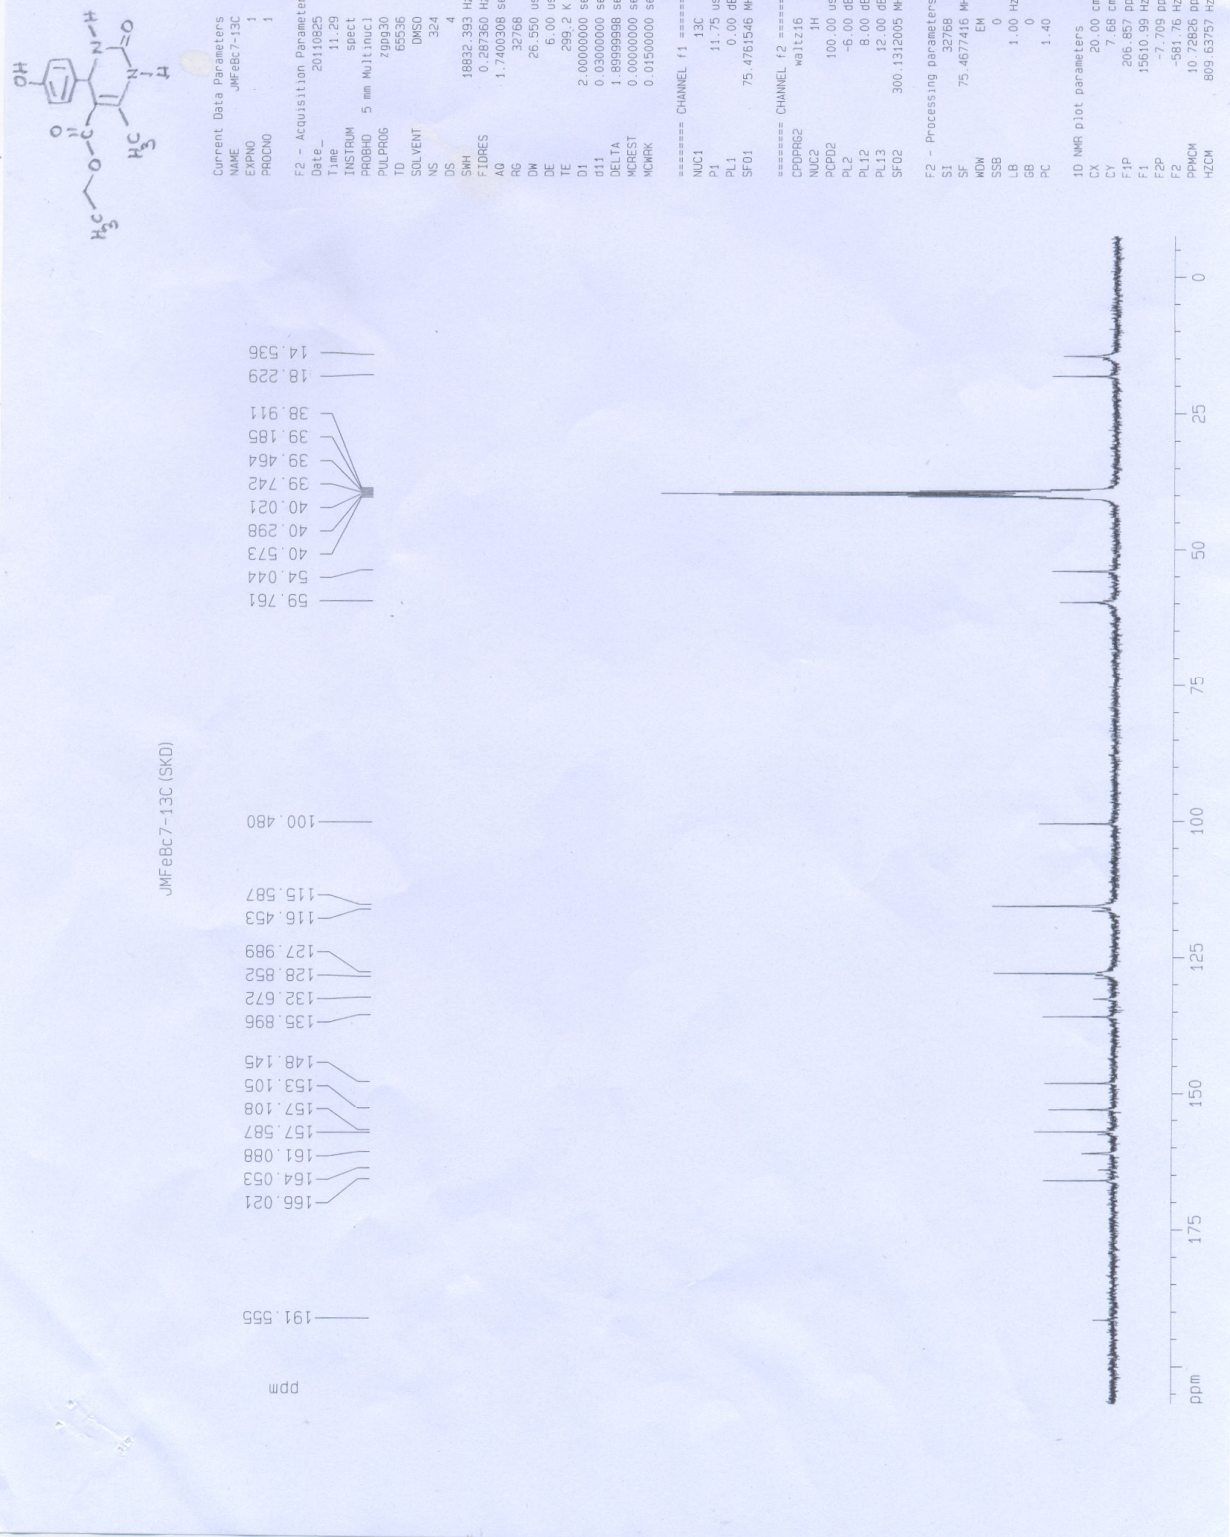



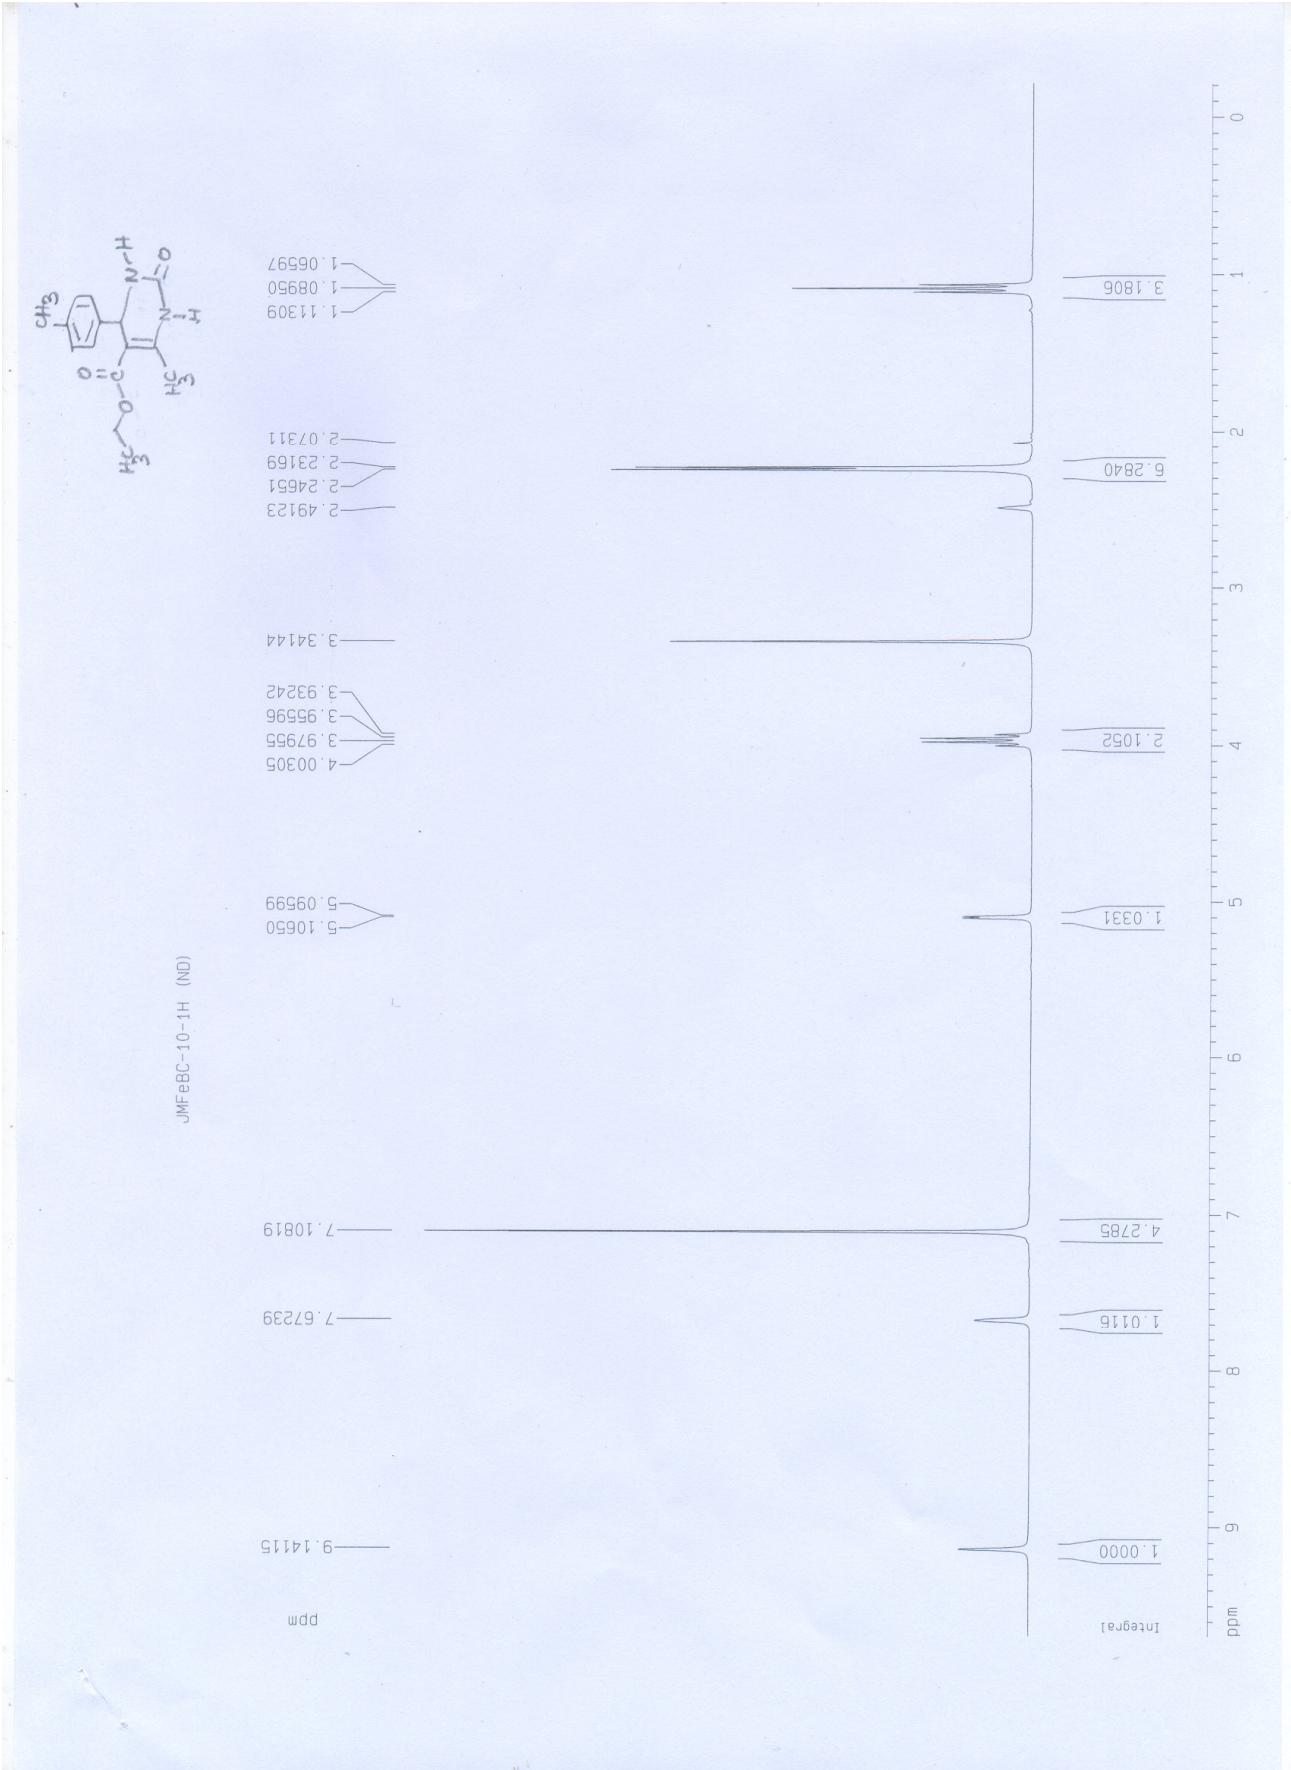



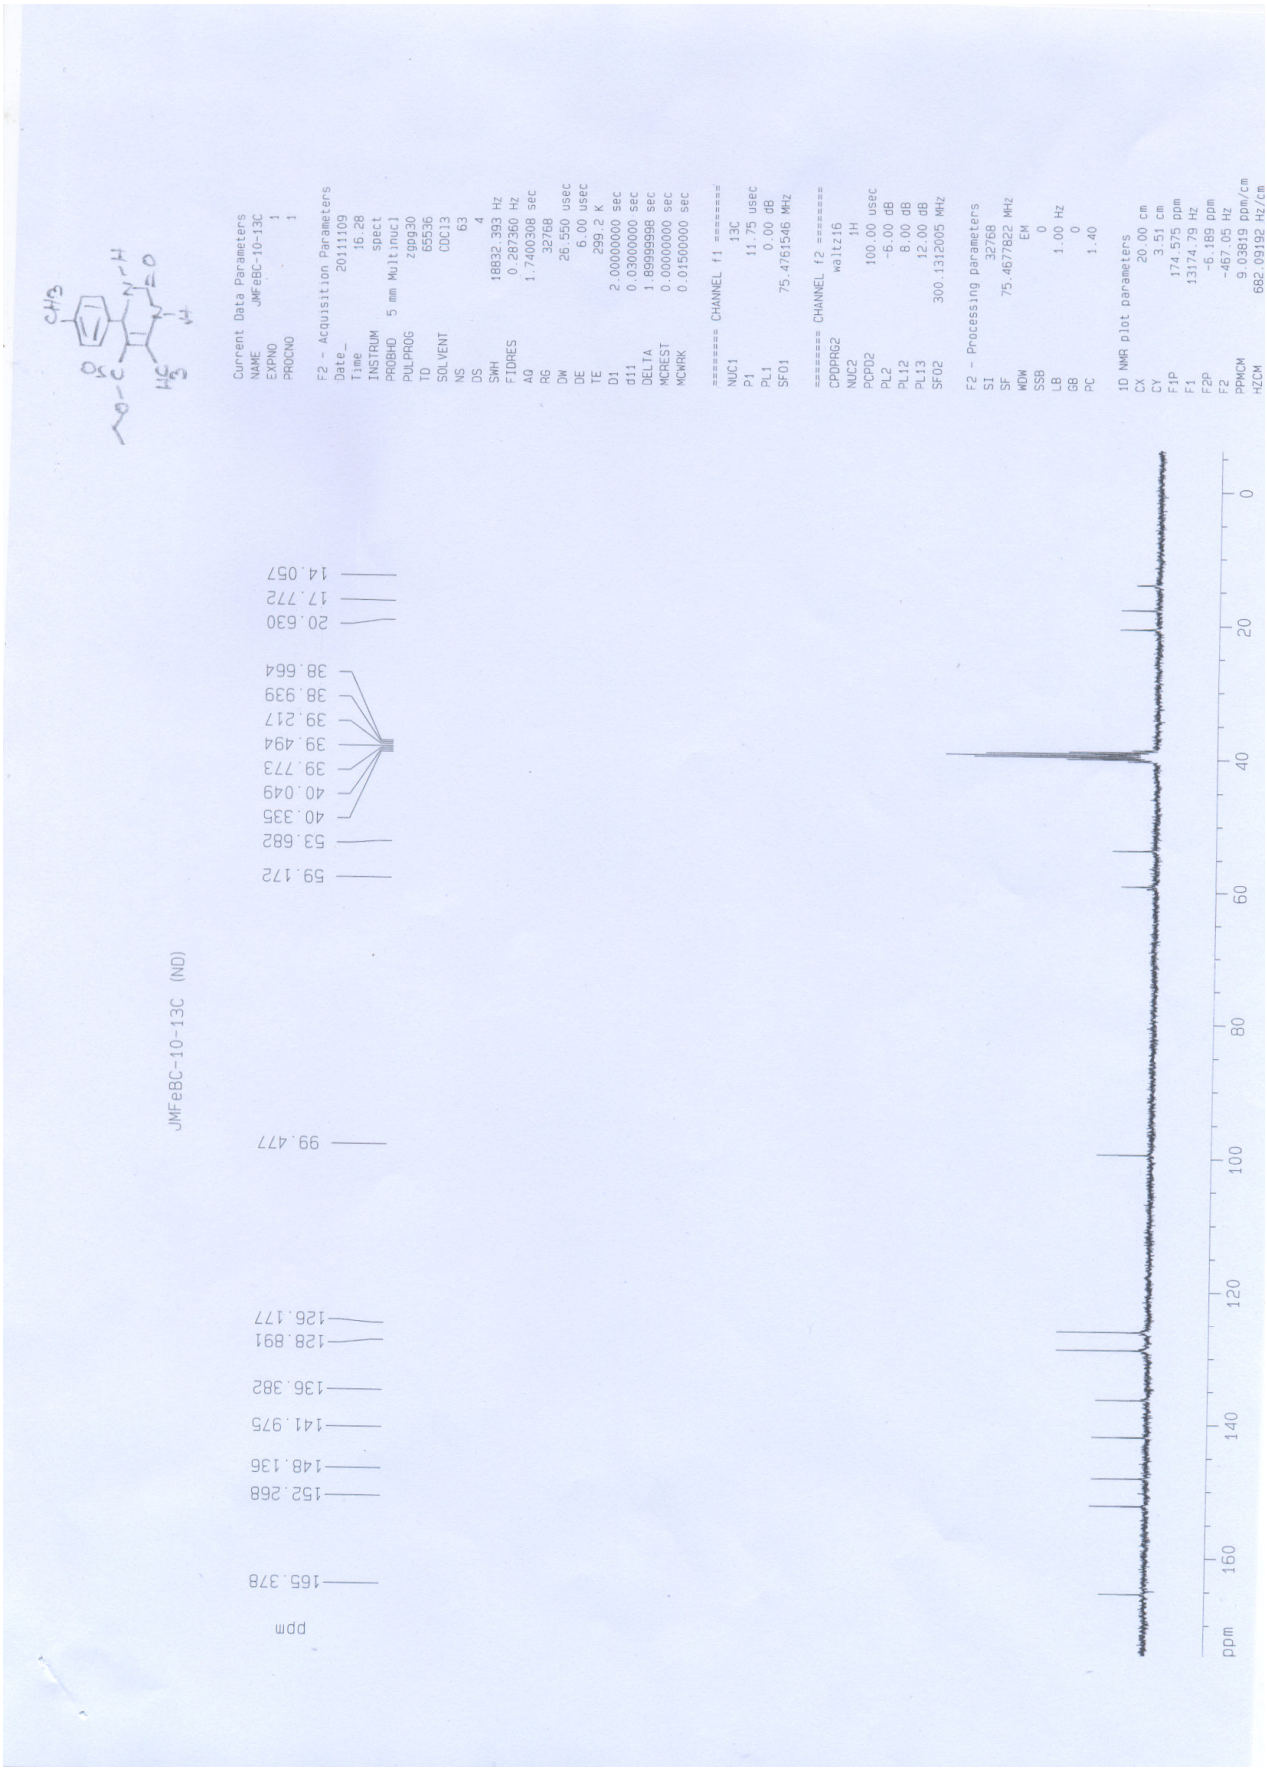



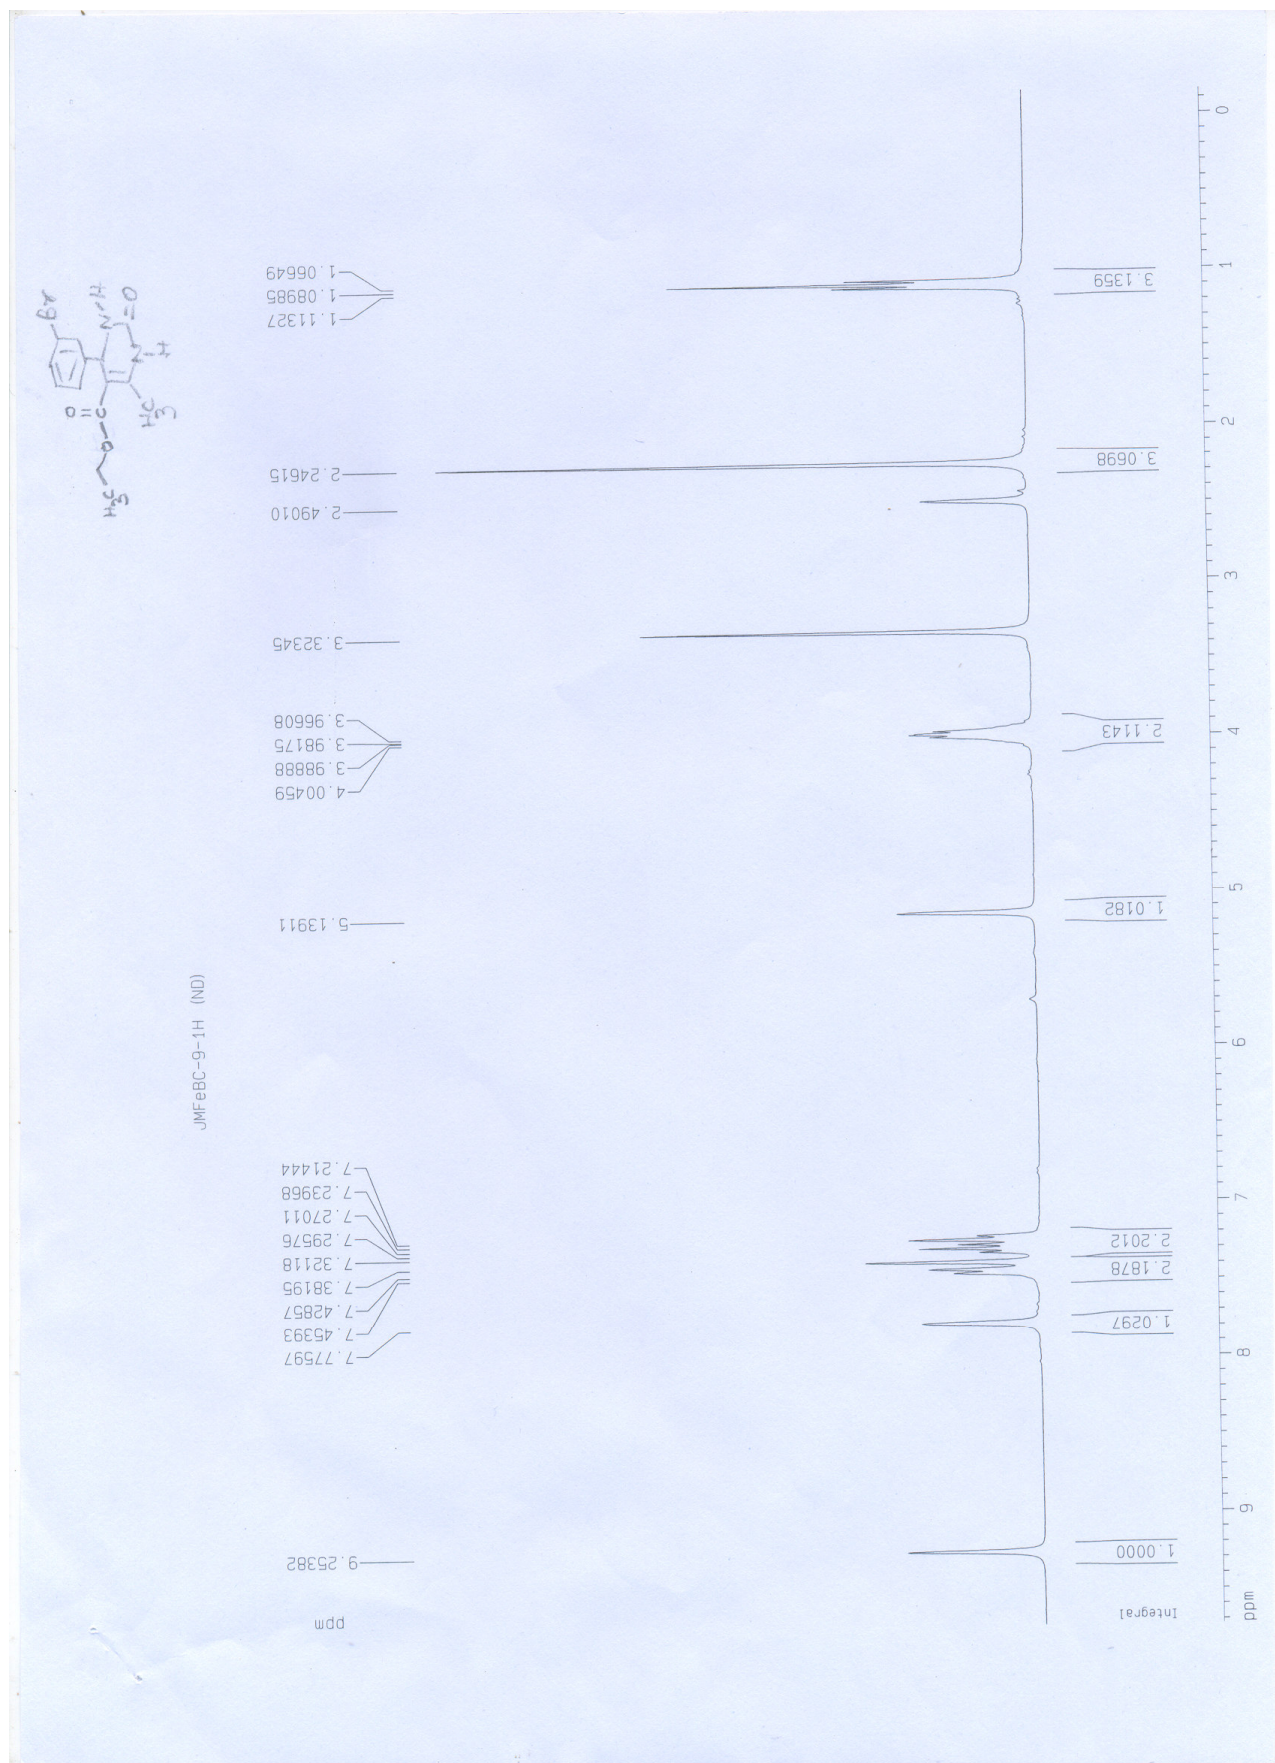



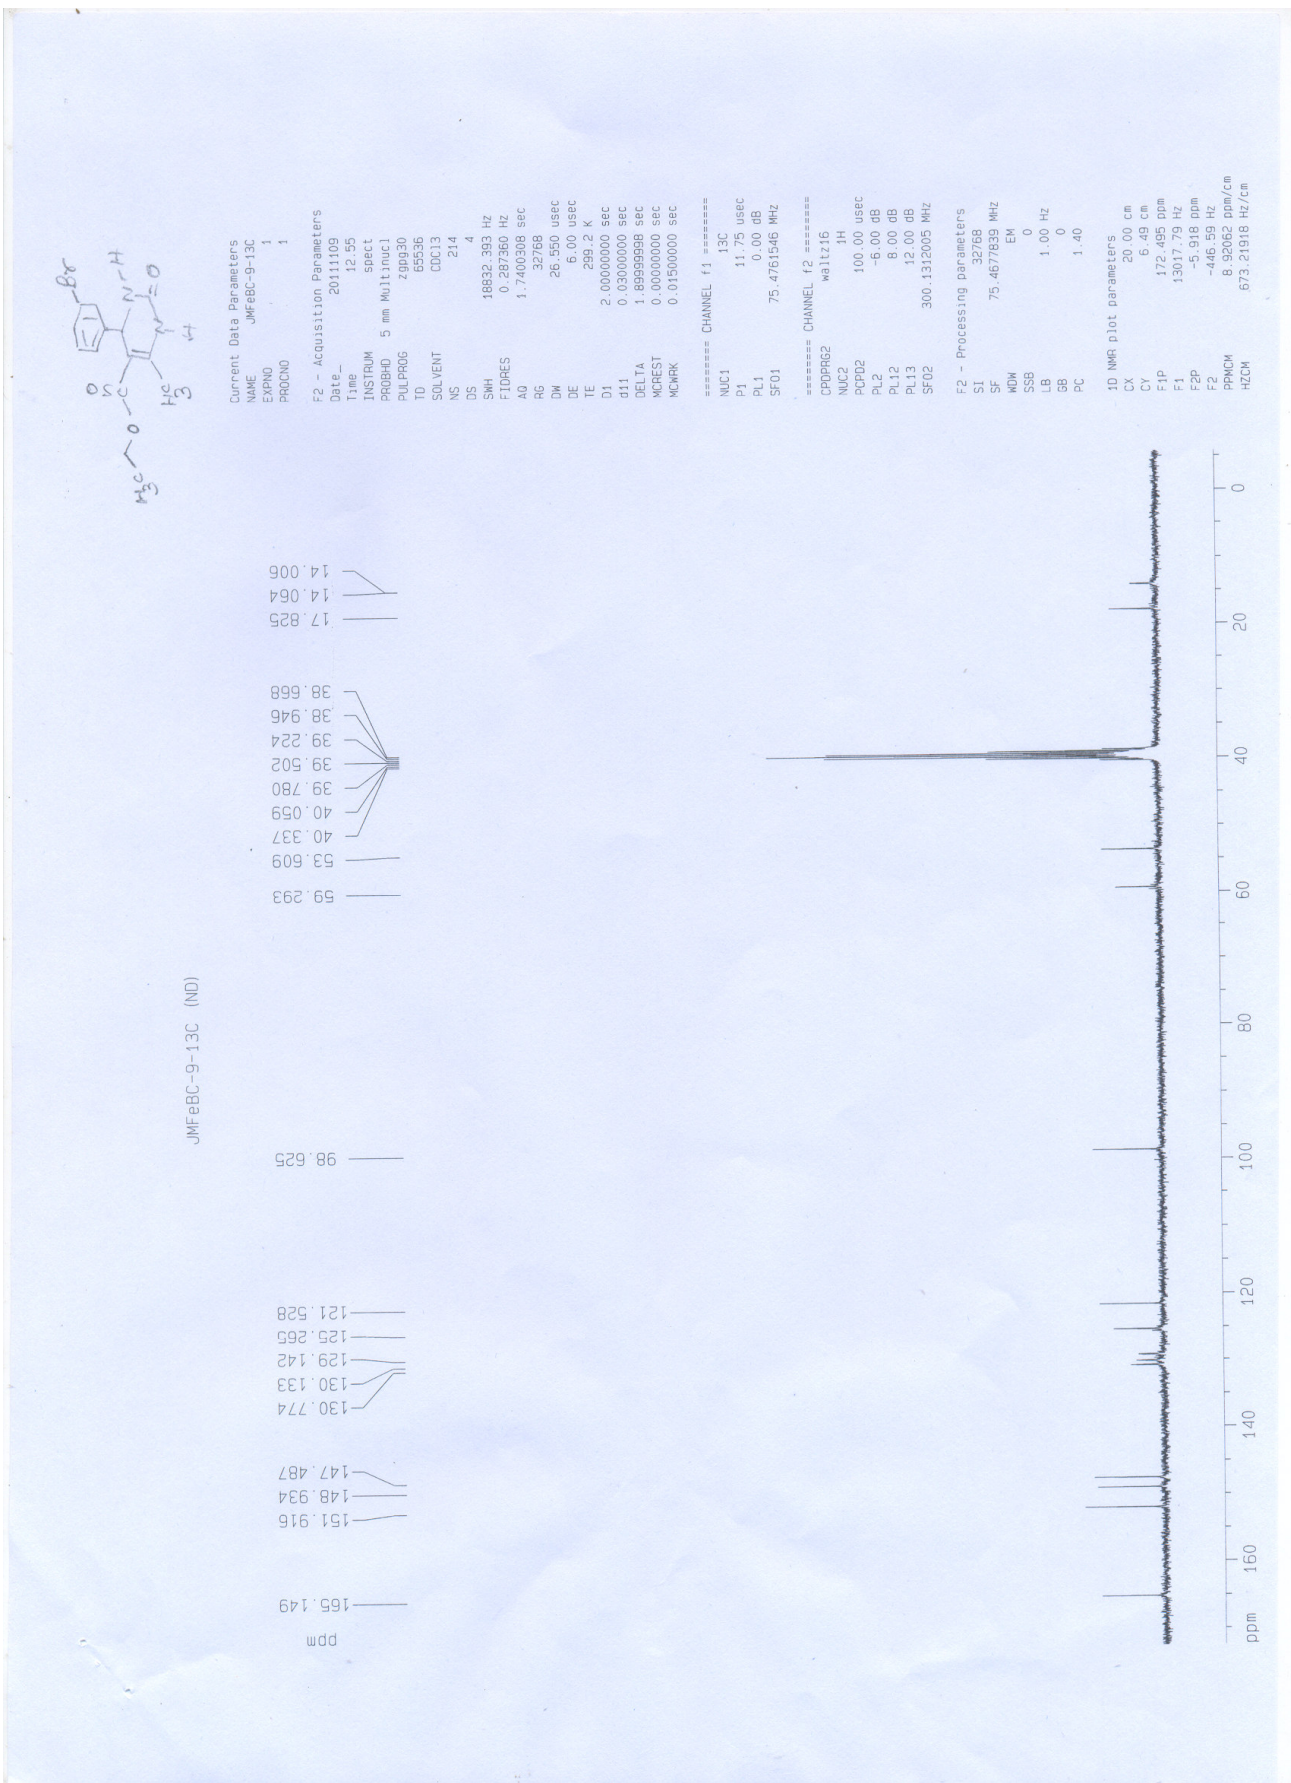



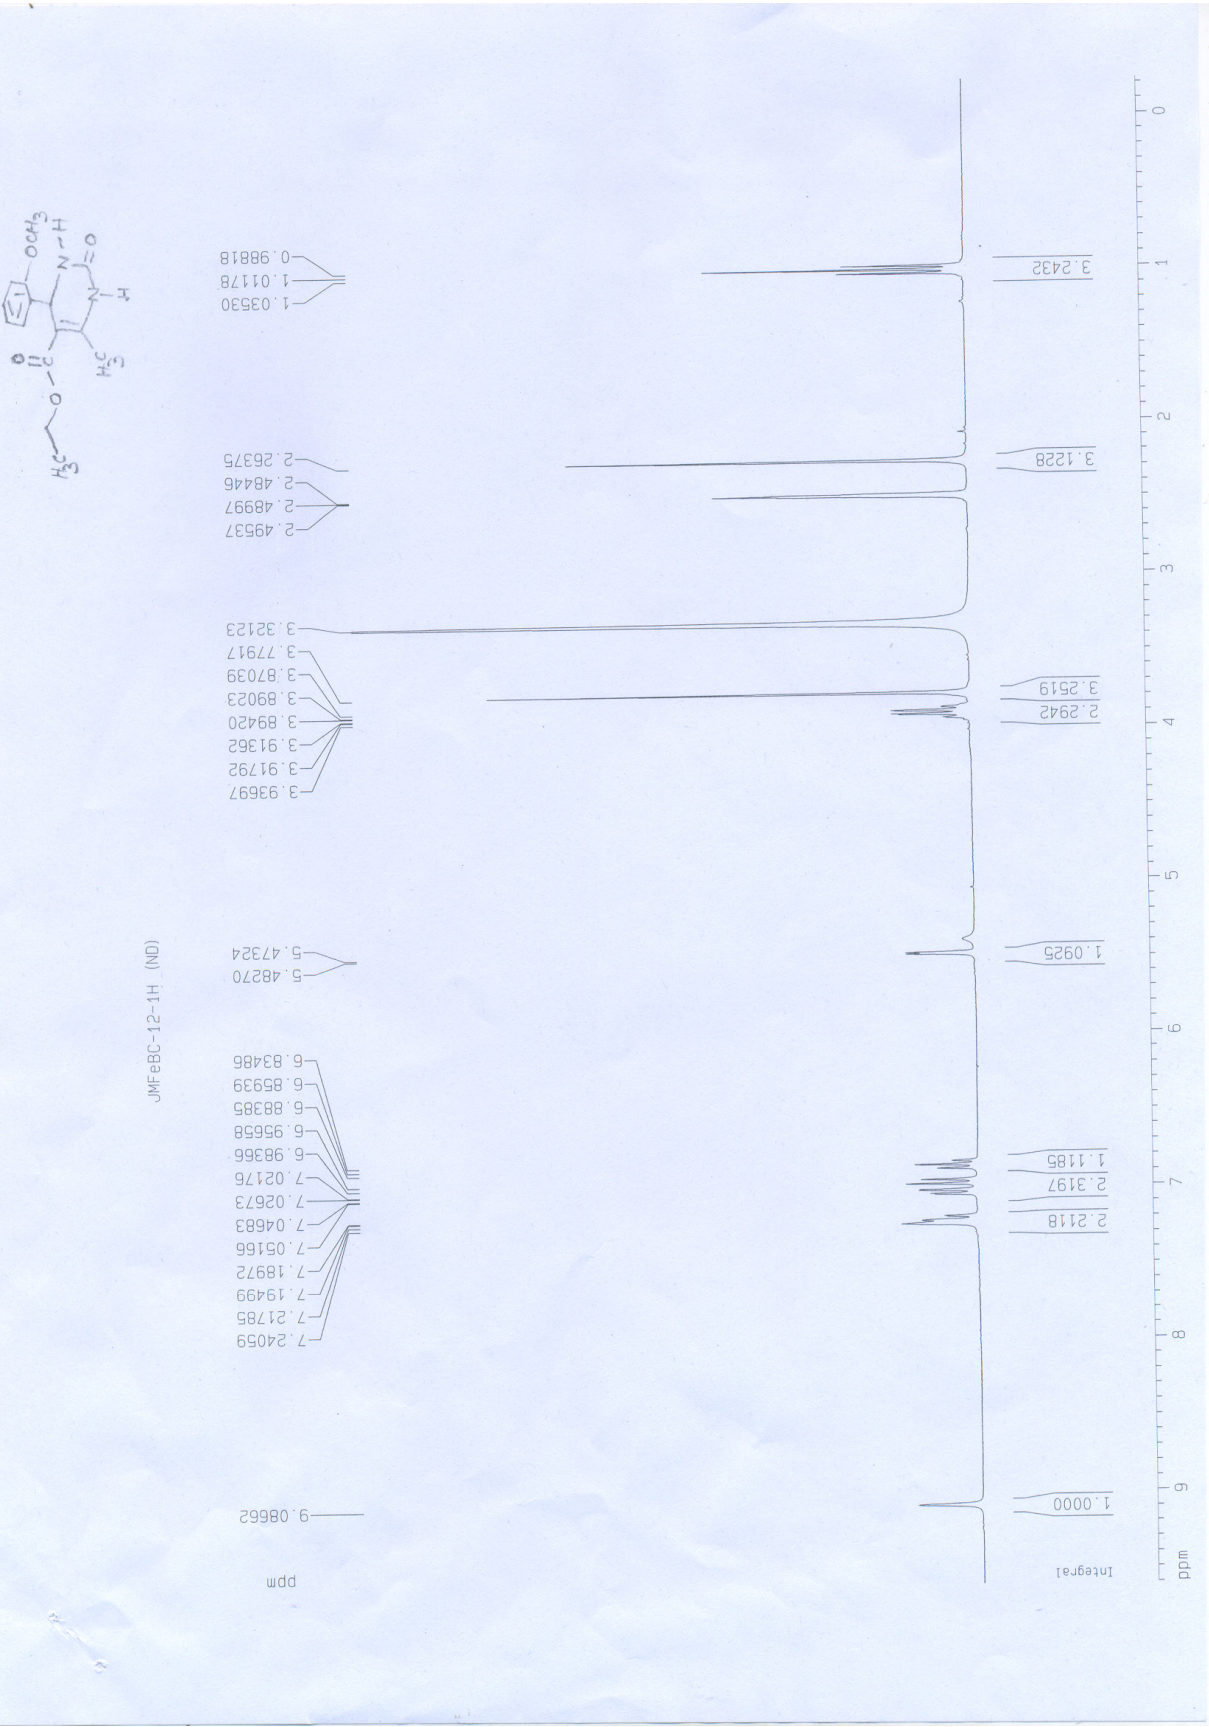



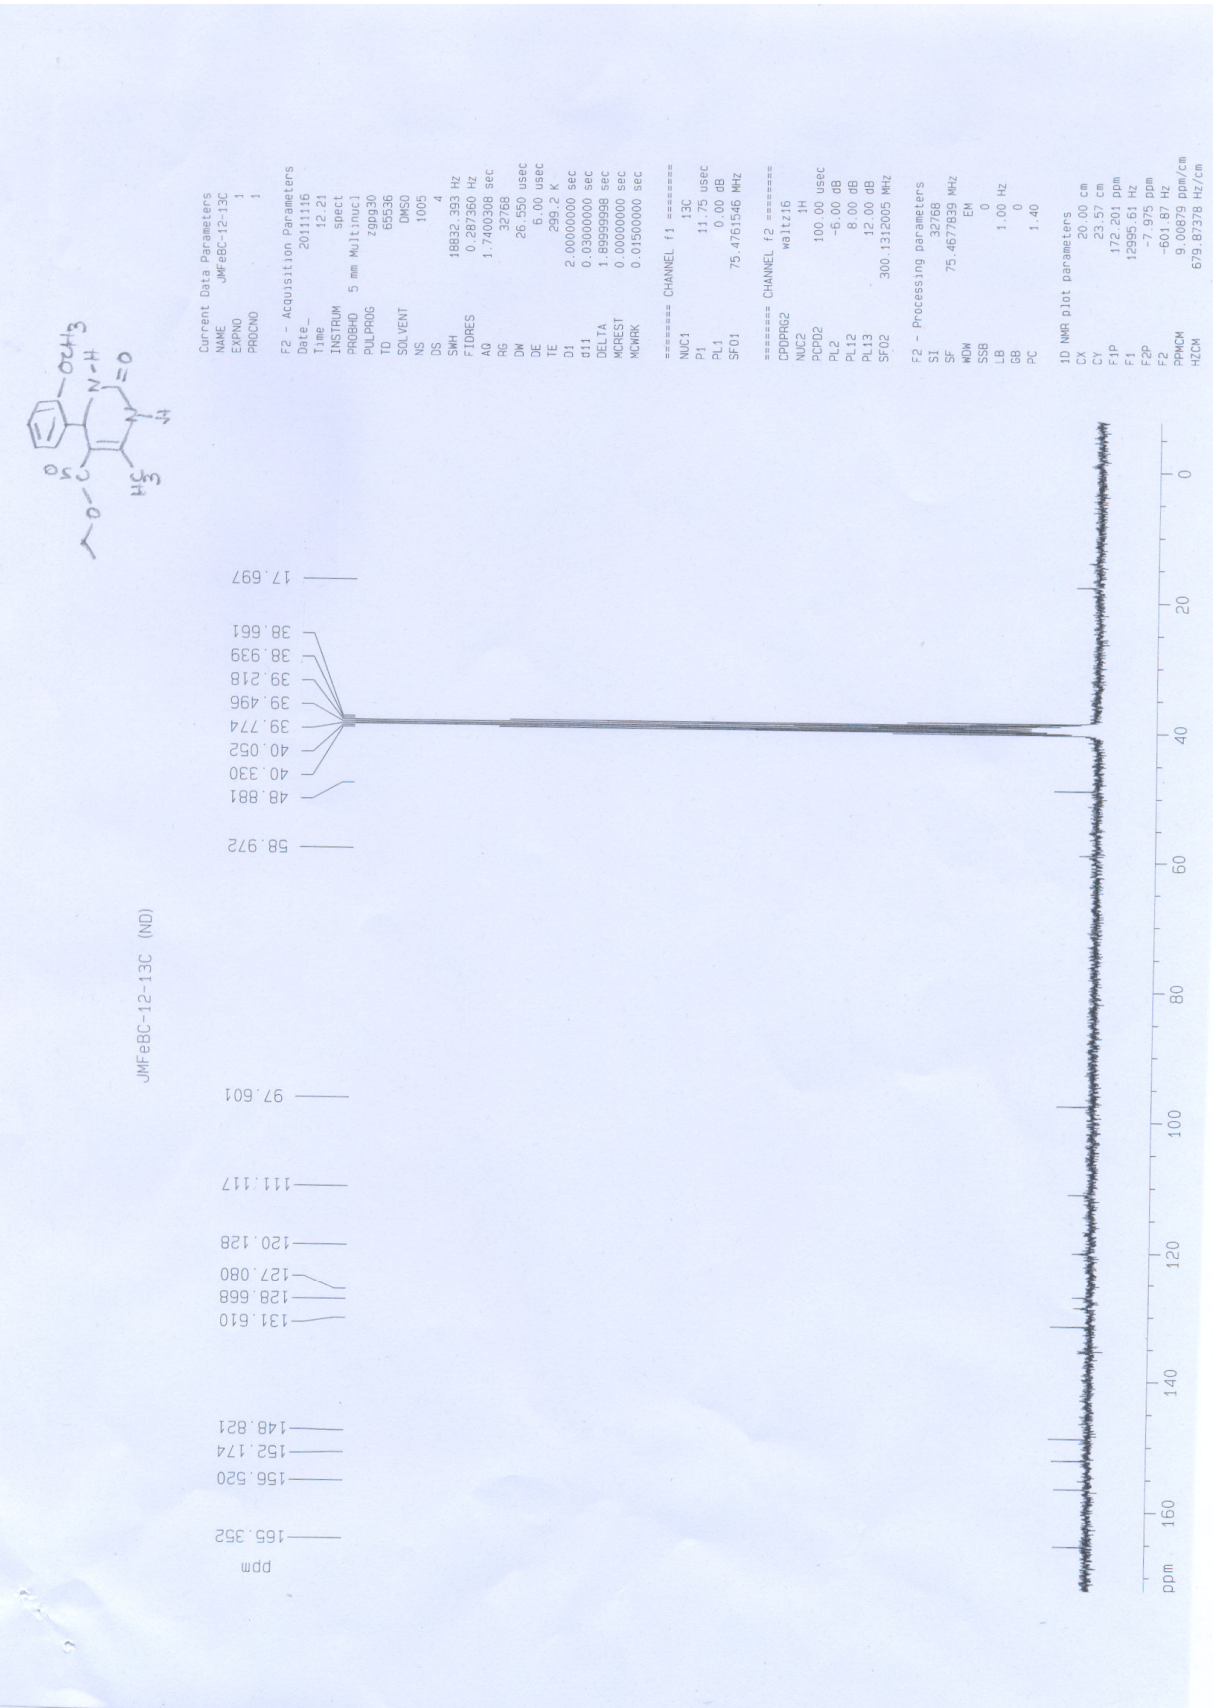



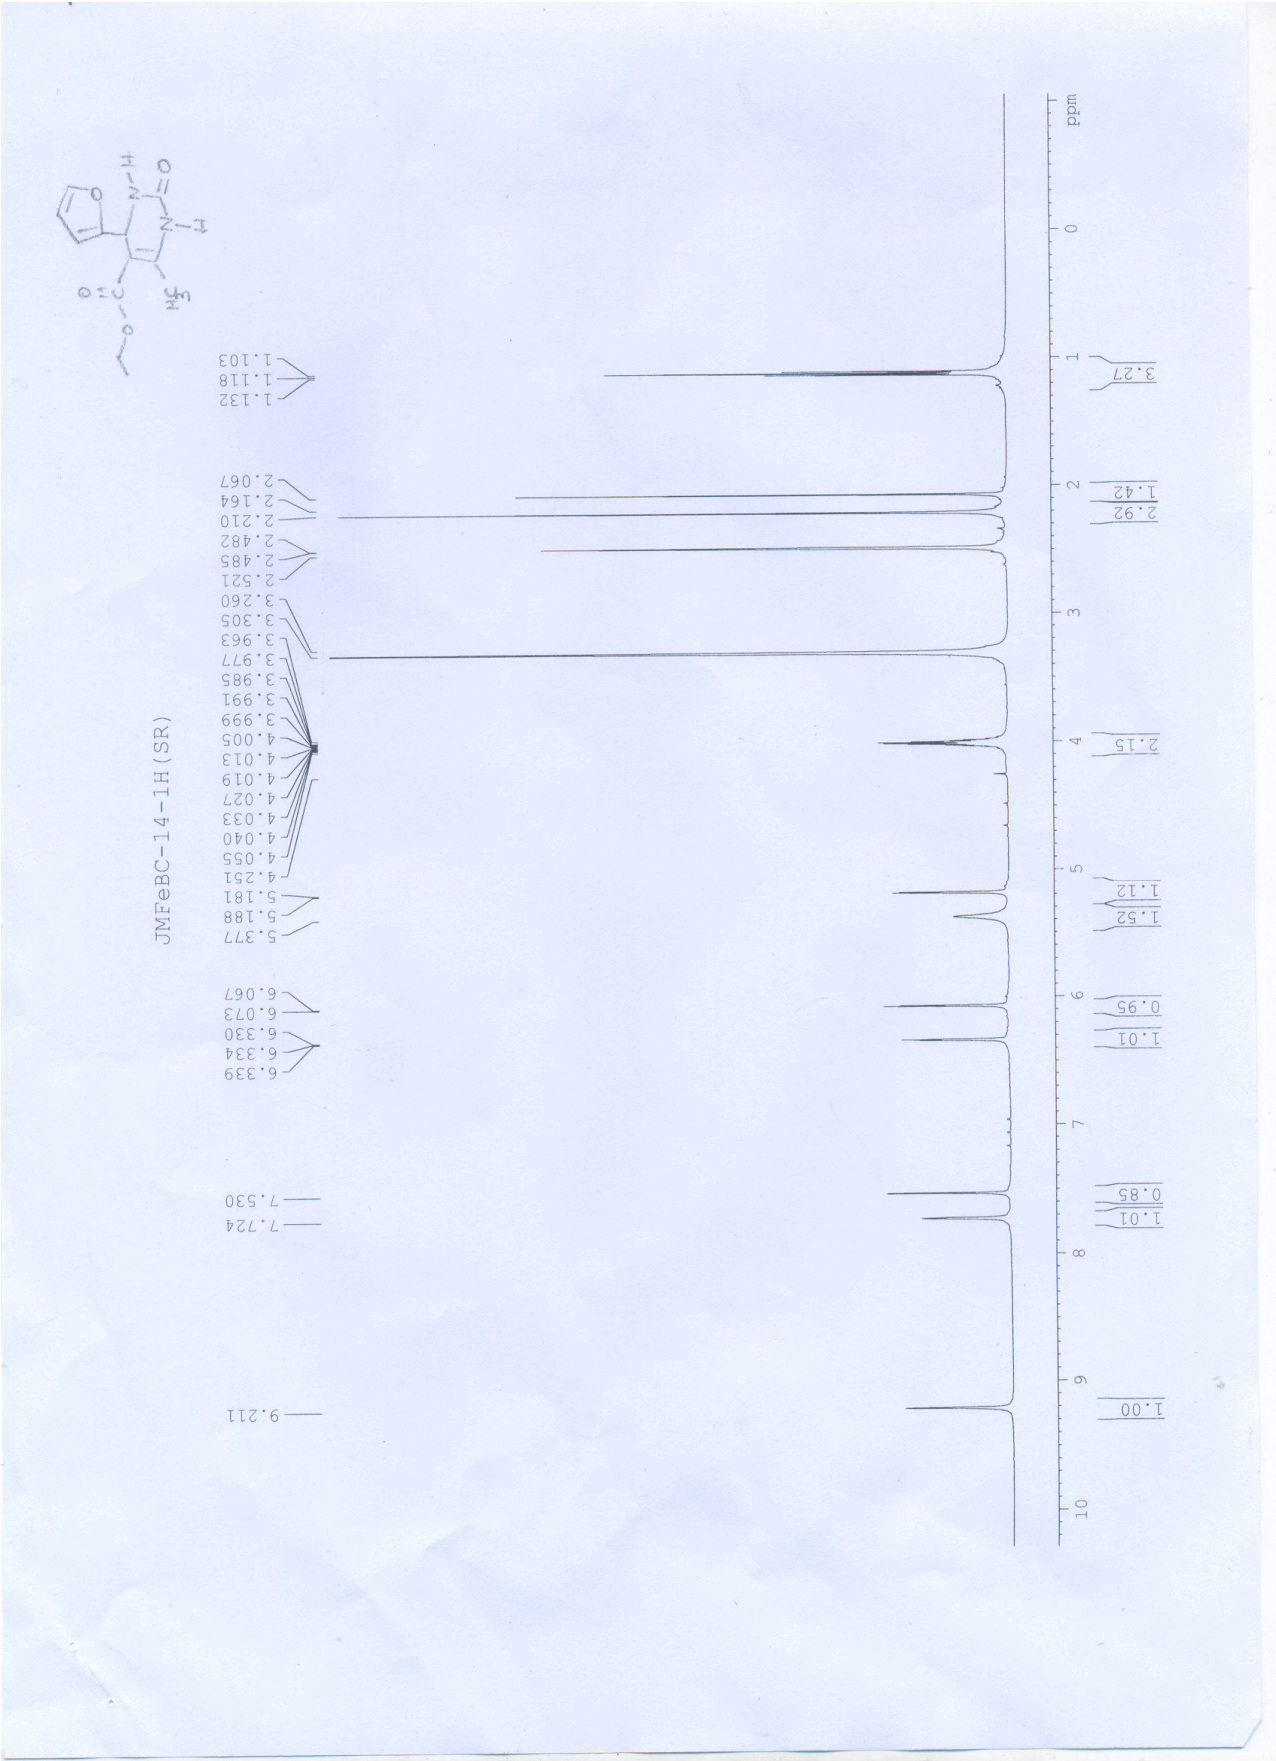



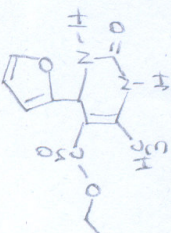

JMFeBC-14-13C (SR)

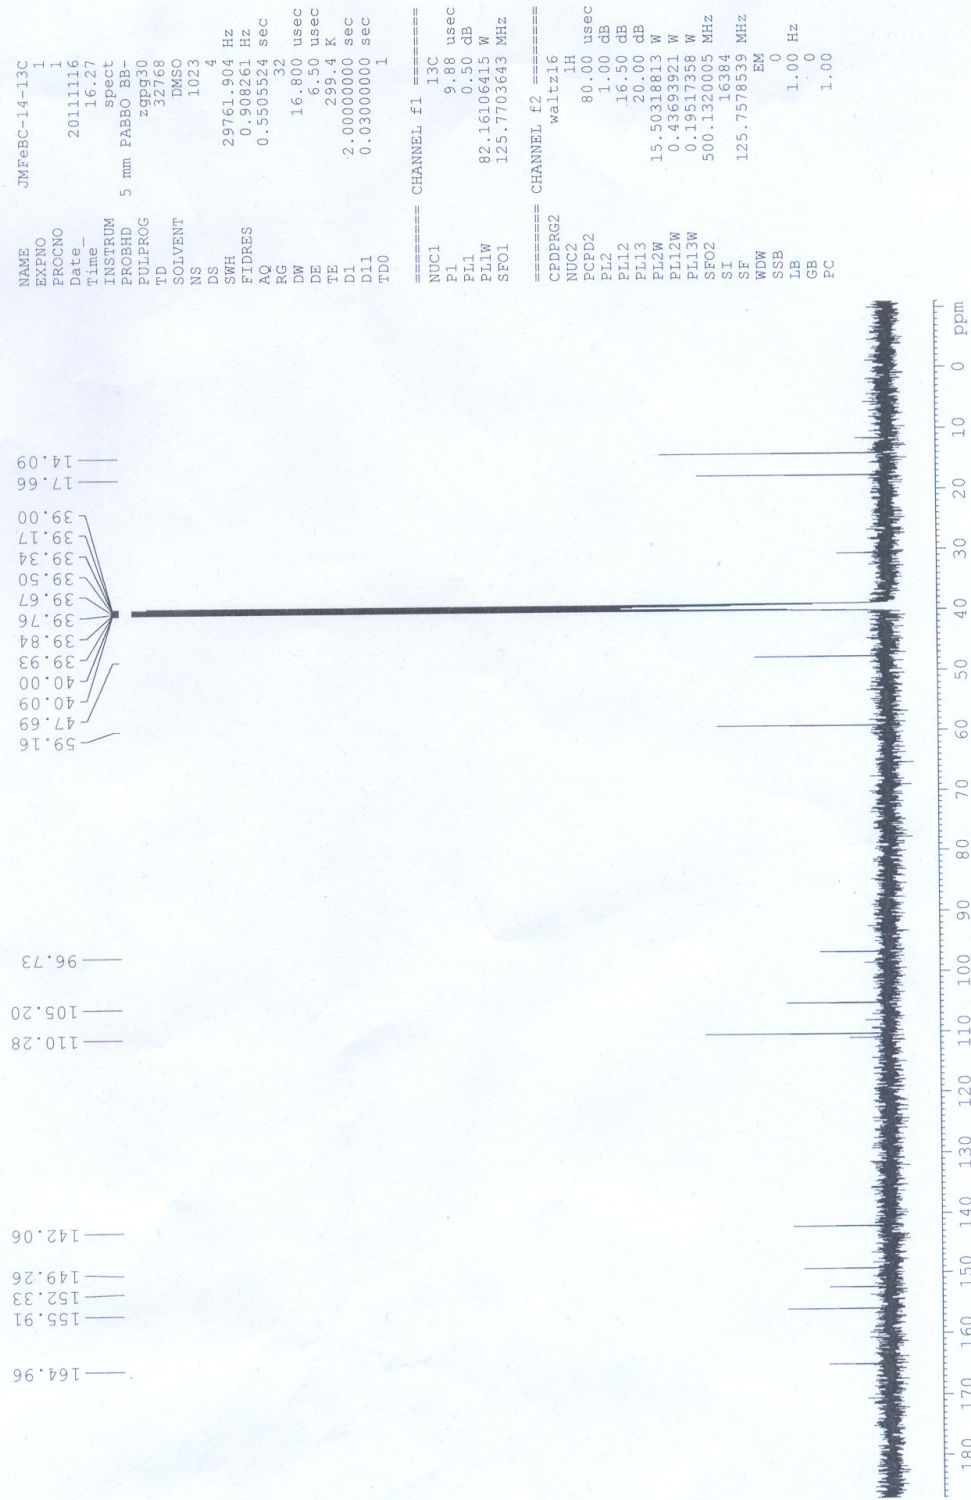



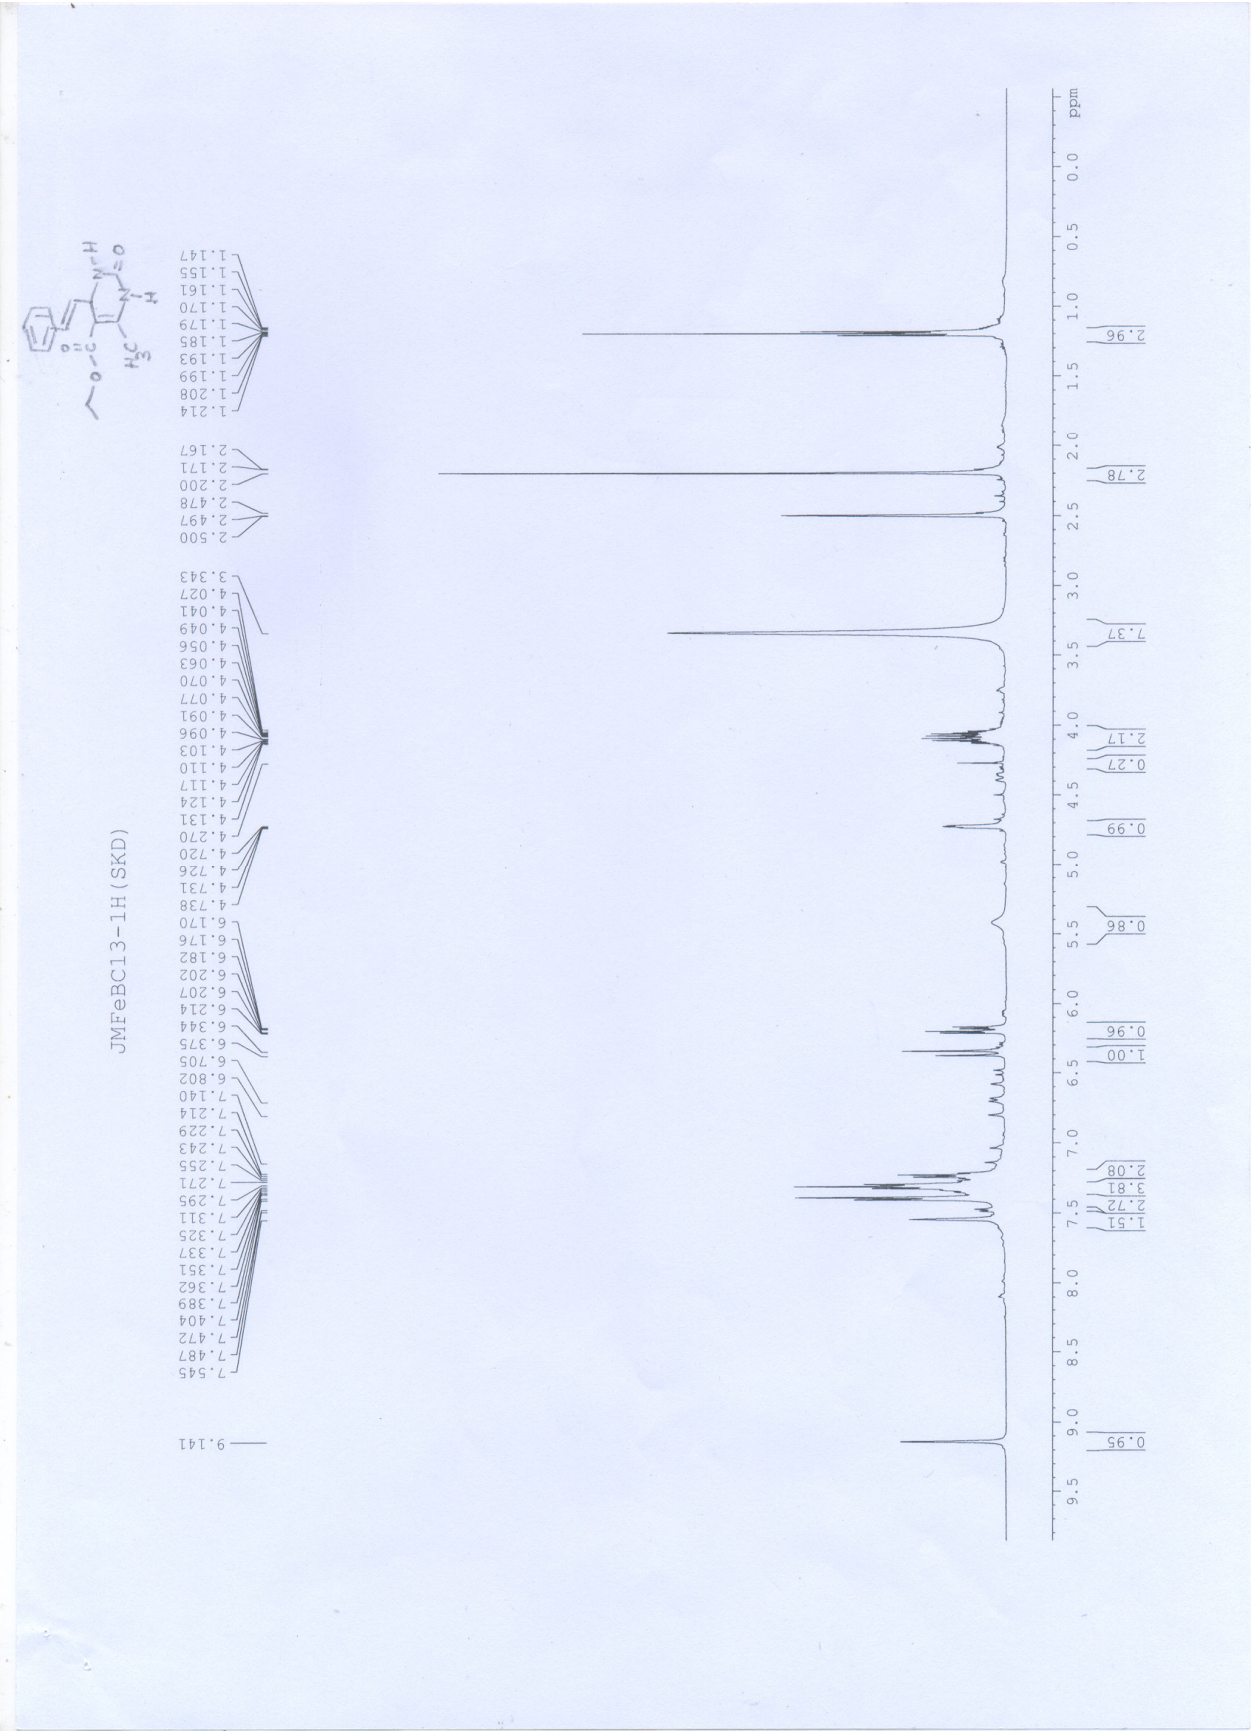



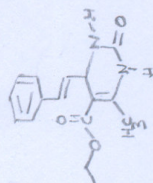

JMFeBC13-13C (SKD)

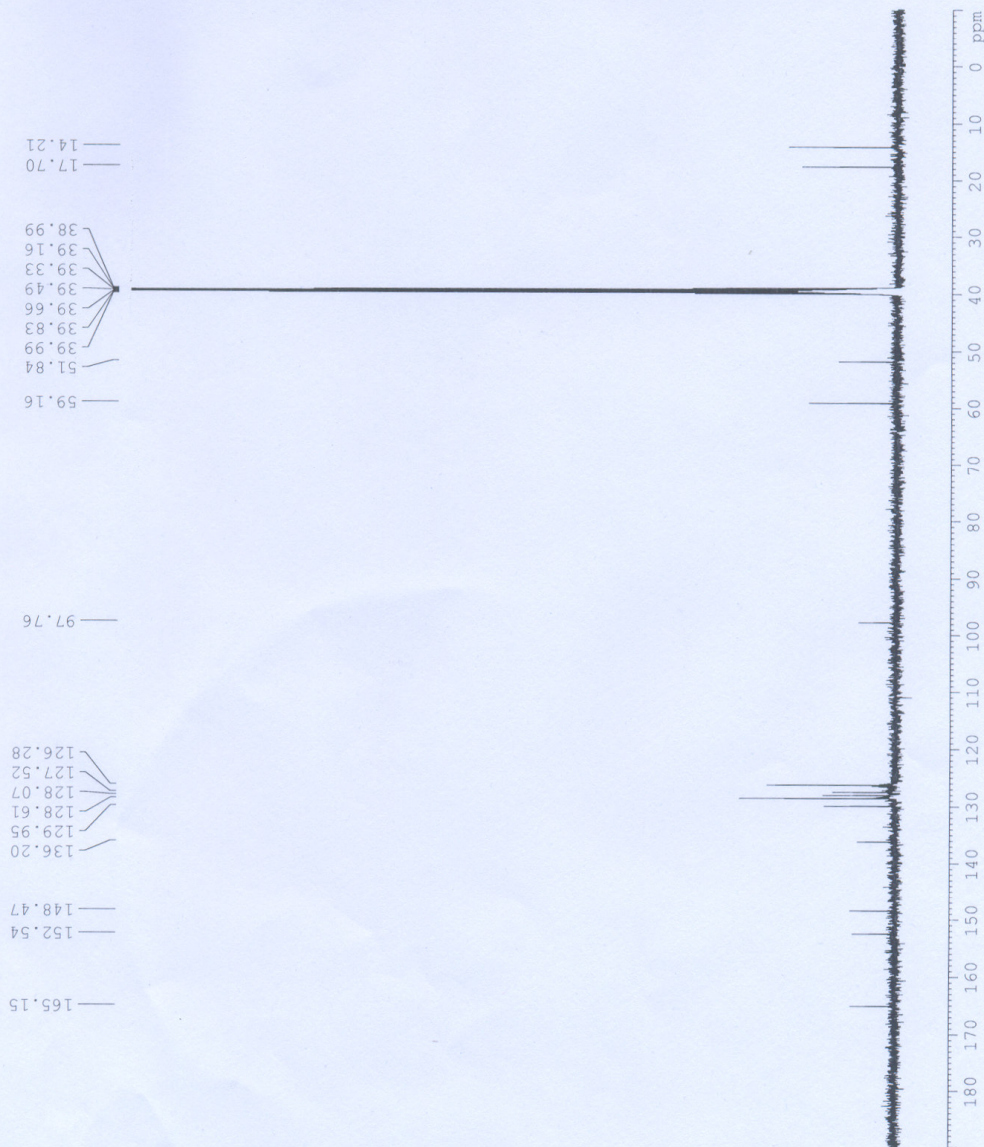

NAME JMFeBC13-13C  
EXPNO 1  
PROCNO 1  
Date\_ 20111115  
Time\_ 15.08  
INSTRUM spect  
PROBHD 5 mm PABBO BB-  
PULPROG zgpg30  
TD 32768  
SOLVENT DMSO  
NS 501  
DS 4  
SWH 29761.904 Hz  
FIDRES 0.908261 Hz  
AQ 0.5505524 sec  
RG 32  
DW 16.800 usec  
DE 6.50 usec  
TE 299.4 K  
D1 2.00000000 sec  
D11 0.03000000 sec  
TD0 1

===== CHANNEL f1 =====  
NUC1 13C  
P1 9.88 usec  
PL1 0.50 dB  
PL1W 82.16106415 W  
SFO1 125.7703643 MHz

===== CHANNEL f2 =====  
CPDPRG2 waltz16  
NUC2 1H  
PCPD2 80.00 usec  
PL2 1.00 dB  
PL2W 16.50 dB  
PL3 20.00 dB  
PL3W 15.50318813 W  
PL2W 0.43693921 W  
PL3W 0.19517338 W  
SFO2 500.1320005 MHz  
SI 16384  
SF 125.7578539 MHz  
WDW EM  
SSB 0  
LB 1.00 Hz  
GB 0  
PC 1.00
